# Supplementary material
Source: publisher site journal article supplement (http://bdj.pensoft.net//lib/ajax_srv/article_elements_srv.php?action=download_suppl_file&instance_id=3309654)

# Options for the **Control** of **Influenza**

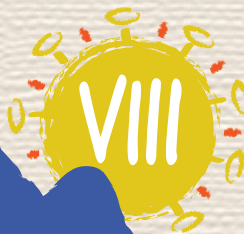

Cape Town, South Africa  
5-10 September 2013

## Programme Book

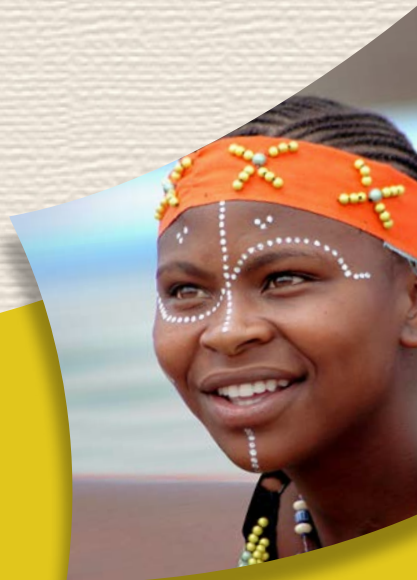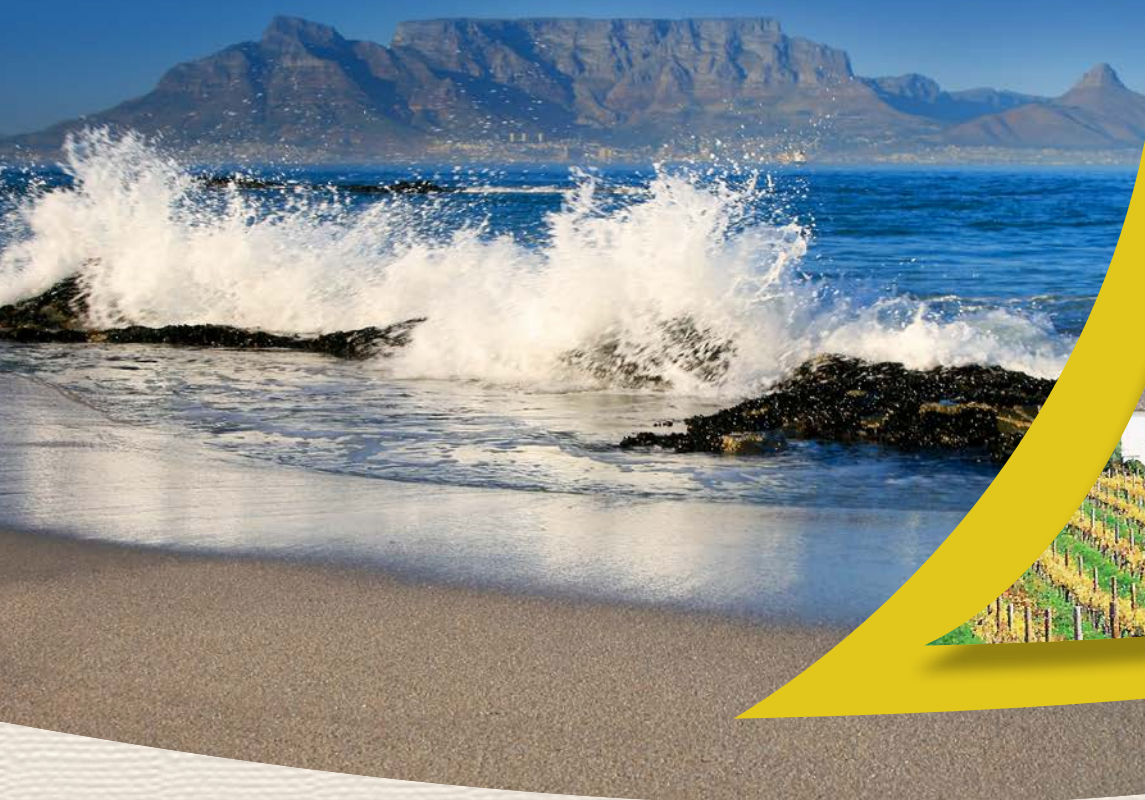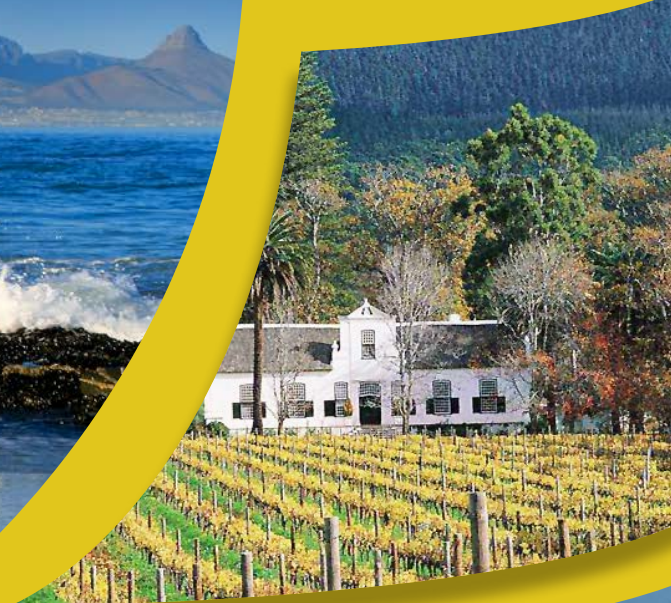

[www.controlinfluenza.com](http://www.controlinfluenza.com)

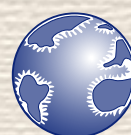

**isirv**  
International Society for  
Influenza and other  
Respiratory Virus Diseases

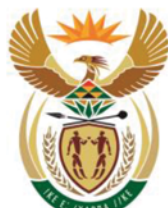

**MINISTRY  
HEALTH  
REPUBLIC OF SOUTH AFRICA** PRETORIA

Private Bag X399, PRETORIA, 0001, 20th Floor, Civitas Building, Cnr Thabo Sehume and Bloed Streets, PRETORIA, 0001

Tel: (012) 395 8086 Fax: (012) 395 9165

CAPE TOWN

Private Bag X9070, CAPE TOWN, 8000, Room 413, 120 Plain Street, CAPE TOWN, 8000 Tel: (021) 466 7670 Fax: (021) 465 1575

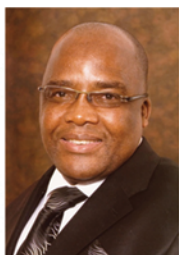

### **Minister's Greetings**

It is my honor to welcome you to the *Options for Control of Influenza VIII Conference*, in this beautiful city of Cape Town. This is the first Options Conference to be held in Africa, so we are proud that South Africa is the host.

Every three years, Options brings together more than a thousand laboratory scientists, doctors, veterinarians, policymakers, epidemiologists, journalists, and those in private industry from around the world for the largest international scientific conference for influenza. The conference will provide comprehensive state-of-the-art scientific information for all disciplines involved in influenza prevention, control and treatment, including seasonal influenza and pandemic planning.

This conference has great significance, as the world recovers from the recent 2009 H1N1 pandemic. We should however, not lose focus of the other influenza strains that have impending pandemic potential such as H5N1 and the most recent H7N9. We should also be reminded that much work still need to be done in area such as: enhancing influenza surveillance and communicating risks, promoting collaboration and training among researchers and other stakeholders across countries and continents as well as advancing and sharing new technologies for vaccine development.

The South African Ministry of Health would like to take this opportunity to thank the *International Society for Influenza and other Respiratory Virus Diseases* for hosting this conference in our country; and wish the organizers and delegates fruitful deliberations that will strengthen influenza control nationally, regionally and globally.

Sincerely,

**Dr Aaron Motsoaledi**  
**Minister of Health**

# Welcome Letter

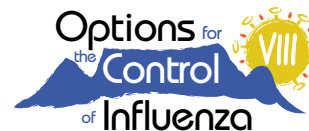

Cape Town, South Africa • 5-10 September 2013

On behalf of the Organizing Committee, I would like to warmly welcome you to Cape Town, the Mother City, for the *Options for the Control of Influenza VIII Conference*. This is the first time that *Options* has been held in Africa, ensuring that the *Options* series of meetings has now visited each of the 5 continents. This provides a unique opportunity to stimulate research, clinical, and public health influenza activities on the African continent. Therefore, a vote of thanks to **isirv** for having faith in South Africa as a venue for this conference, particularly at a time of global recession.

It is often said that the only predictable thing about influenza is its unpredictability, and in that respect, it never ceases to disappoint. The emergence of H7N9 in China is the latest example of our precarious relationship with animals and the continuing importance of the animal-human interface. A dedicated workshop has been fashioned to highlight the key issues in the H7N9 outbreak. Furthermore, this year's feature cornerstone session on Saturday is devoted to the animal-human interface and promises to be another highlight of the conference. During this session, we will debate some of the ethical issues around dual use and gain of function research, which ignited around H5N1 and has now been brought back to the forefront with respect to planned experiments for H7N9.

New to this year's *Options VIII* conference will be poster walkabouts, where international experts in the field will lead visits to a themed set of related posters. We hope that this will enhance the presentation and interaction around some of the outstanding posters that were submitted.

I wish to thank everyone who has worked so hard to make the *Options VIII* meeting possible. Thank you to members of the Organizing and Scientific Committees who have dedicated their time and expertise to developing this excellent and challenging programme. A special vote of thanks to Stacey Schultz-Cherry, co-chair of the scientific committee, who has worked harder than anyone to bring the *Options VIII* programme together. I would like to acknowledge the generous financial support of our meeting sponsors, and thank Lynne Pryor, Lynda Browning, and all at Integress Meetings and Events, the company that has done an excellent job in organizing this meeting.

Finally, on behalf of the Organizing and Scientific Committees of *Options VIII*, I wish you a stimulating, vibrant, and enjoyable conference. I hope very much that you will take time to experience some of the wonders that this magical city offers, be it the beaches, mountains, or vineyards and to experience the warmth and hospitality of the South African people.

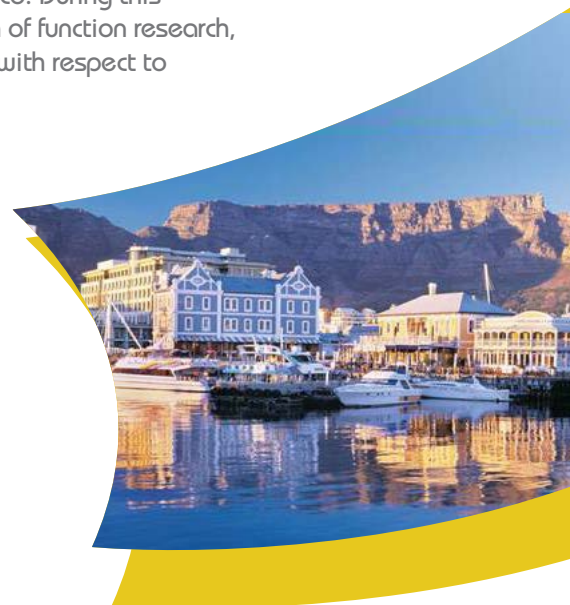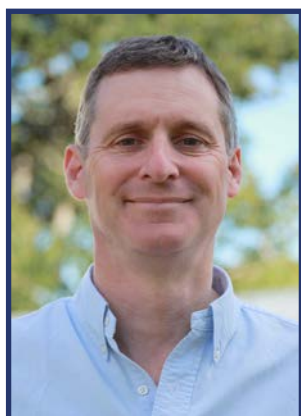

A handwritten signature in blue ink that reads 'Marc Mendelson'.

**Marc Mendelson**

Conference Chair, Options for the  
Control of Influenza VIII  
Head of Division of Infectious  
Diseases and HIV Medicine  
Groote Schuur Hospital  
University of Cape Town  
Cape Town, South Africa

# Welcome from Scientific Committee

Dear Friends and Colleagues,

Welcome to the first *Options* meeting to be held in Africa. The *Options for the Control of Influenza* has evolved into the biggest scientific gathering in the world of influenza. Options VIII will be unique, providing updates on the evolving H7N9 situation, a panel discussion on the pros and cons of the controversial influenza gain-of-function research, poster walk-about sessions meant to enhance the prominence of work presented as posters, and highlighting our next generation of influenza researchers by having our young scientists co-convene workshop sessions. *Options VIII* offers a wonderful and timely platform for the world's premier researchers, public health experts, government representatives and veterinarians to exchange ideas and discuss critical recent data on influenza virus infection in humans and animals and to discuss its impact on human and animal health.

On behalf of the Scientific Committee, we would like to thank all authors of abstracts submitted to the *Options for the Control of Influenza VIII* for your enthusiastic participation. Your contributions, over 700 abstracts in total, have ensured that this meeting will be a most productive one and ensures its success. The abstracts will be distributed on a flash drive and classified according to the workshop topics where they will be presented. Given the large numbers of outstanding abstracts, exceptional research will be found within the poster sessions. We encourage participants to not only enjoy the workshop and poster sessions, but to participate in the host-led poster walk-about, which we hope will enhance the prominence of the work presented in the poster session.

Finally, we sincerely thank all the members of the Scientific and Organizing Committees for their outstanding efforts in organizing the *Options* scientific program and in reviewing large numbers of abstracts. We hope that everyone will have a wonderful and productive meeting as well as taking the time to enjoy beautiful Cape Town.

Wishing you a successful meeting.

Sincerely,



**Wolfgang Preiser**

Scientific Committee Chair

Head: Division of Medical Virology

Department of Pathology

Faculty of Health Sciences

Stellenbosch University and National Health Laboratory Service (NHLS)

Stellenbosch, South Africa

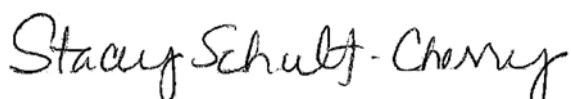

**Stacey Schultz-Cherry**

Scientific Committee Co-Chair

Associate Member, Department of Infectious Diseases

St Jude Children's Research Hospital

Memphis, TN USA

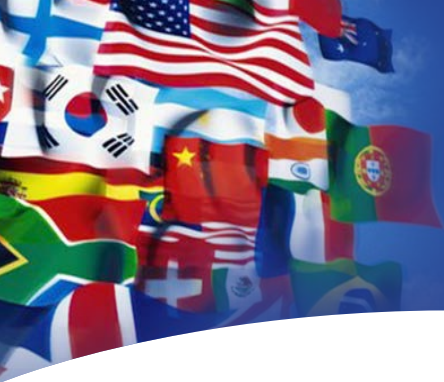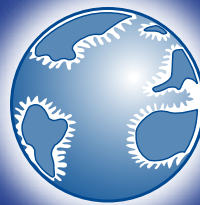

**isirv**  
International Society for  
Influenza and other  
Respiratory Virus Diseases

On behalf of the International Society for Influenza and other Respiratory Virus Diseases (isirv), I would like to welcome you to the *Options for the Control of Influenza* Conference in Cape Town. This is the eighth of the series of *Options* meetings that have taken place every 3 to 4 years since the first meeting in the United States in 1985. This is the first of the *Options* meetings to take place on the African continent.

The *Options* meetings are not only the largest of the scientific meetings devoted exclusively to influenza but are unique in bringing together participants from all over the world representing disciplines as diverse as molecular virology, clinical medicine, epidemiology, health economics, and sociology, together with participants from public health institutions, governments, and industry. The meeting provides the opportunity for sharing of the latest research findings and updates on the state of the art in all aspects of influenza. It also provides the opportunity for interdisciplinary discussion both within and outside the formal scientific programme of the Conference.

**isirv** is privileged to have been able to take on the responsibility for ensuring that this unique and important series of meetings is continued. **isirv** was formed as a scientifically independent membership based organisation with the aim of promoting work to prevent, detect, treat, and control influenza and other respiratory virus diseases throughout the world. In addition to *Options*, **isirv** organises scientific meetings in a wide range of aspects of influenza and other respiratory virus diseases and publishes the successful journal "Influenza and other Respiratory Viruses". Please take advantage of your membership of **isirv**, through attendance at this Conference, and visit the **isirv** stand to find out about the range of **isirv** activities that will be of interest to you.

**isirv** would not, however, be able to fulfill its responsibility to ensure the continuation of the *Options* tradition without our local hosts in Cape Town, our conference organisers (Integress), and the scientific and organizing committees chaired by Marc Mendelson, Stacey Schultz-Cherry, and Wolfgang Preiser. We offer them all our most sincere thanks.

On behalf of the Board of **isirv**, I wish all participants at the *Options for the Control of Influenza VIII* meeting a lively, provocative, and productive time, and an enjoyable stay in Cape Town.

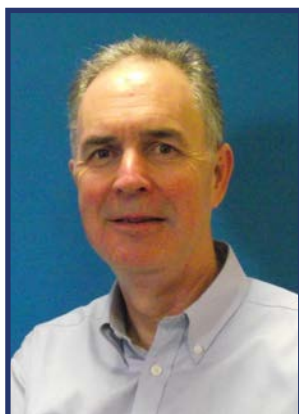

John Watson  
Chairman  
International Society of Influenza and other  
Respiratory Virus Diseases (**isirv**)

# Welcome to the *Options for the Control of Influenza VIII* Conference

5-10 September 2013 • Cape Town International Convention Centre • Cape Town, South Africa

*Options for the Control of Influenza* began as a small scientific symposium in Keystone, Colorado in 1985. Nearly 30 years later, the *Options* conference has become the largest international conference devoted exclusively to all facets of influenza, from basic science to healthcare policy. In order to reach a global audience, this prestigious conference is held approximately every 3 years in a different city. Previous *Options* conference locations include: Courchevel, France, 1992; Cairns, Australia, 1996; Crete, Greece, 2000; Okinawa, Japan, 2003; Toronto, Canada, 2007; and Hong Kong, SAR, China, 2010.

The *Options VIII* conference takes place approximately 6 months after avian influenza A (H7N9) was first observed in China, and just a few short months after the finding of the first potential human-to-human transmission of the same virus. In addition to responding to this global issue, many of this year's presentations demonstrate advances in seasonal and pandemic influenza research, current epidemiological studies, updates on infection control, developments in antiviral resistance, and controversies in clinical care.

## Goals and objectives for the *Options VIII* conference:

- Provide comprehensive scientific guidance for all stakeholders involved in influenza prevention, control, and treatment, including seasonal and pandemic planning
- Promote genuine international and multidisciplinary collaboration, supporting the full spectrum of influenza research, from basic science to the development of new vaccines and antiviral agents to epidemiology and control programs
- Provide a collegial atmosphere where scientists working in public health and in agricultural or veterinary agencies may exchange information to develop collaborative approaches for the control and prevention of pandemic influenza
- Maximize the opportunities for informal discussions and exchange of ideas between representatives of government agencies, academia, and industry

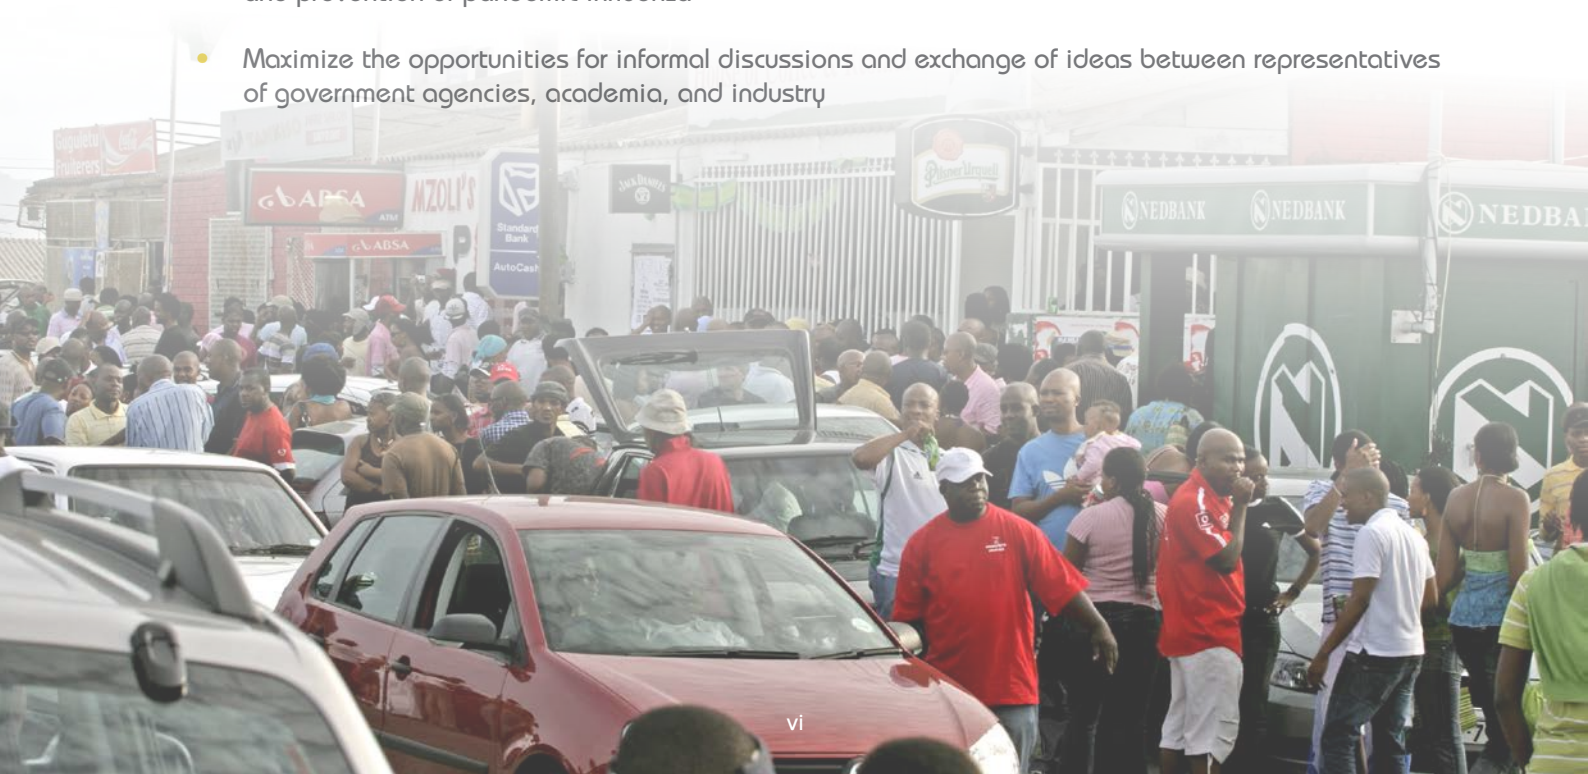

# Table of Contents

|                                                   |        |
|---------------------------------------------------|--------|
| Letters from the Chairs . . . . .                 | iii-iv |
| <b>isirv</b> Chairman Letter . . . . .            | v      |
| Conference Overview . . . . .                     | vi     |
| Organizing Committee . . . . .                    | 3      |
| Scientific Committee . . . . .                    | 4      |
| Supporters . . . . .                              | 5      |
| Scholarship Award Winners . . . . .               | 7      |
| <i>Options VIII</i> General Information . . . . . | 10     |
| Exhibit Hall Floorplan . . . . .                  | 13     |
| Agenda at a Glance . . . . .                      | 14     |
| Badge Policies . . . . .                          | 16     |
| Poster Information . . . . .                      | 17     |
| Convention Center Maps . . . . .                  | 19     |
| Agenda . . . . .                                  | 20     |
| Speaker Presentations . . . . .                   | 40     |
| Sightseeing and Special Tours . . . . .           | 48     |
| Exhibitor Information . . . . .                   | 50     |

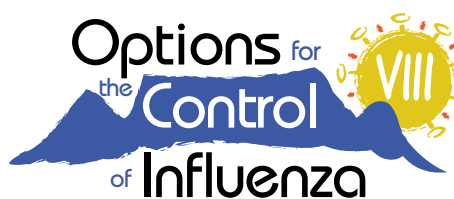

Cape Town, South Africa • 5-10 September 2013

# LEADERS IN HUMAN VIRAL CHALLENGE STUDIES

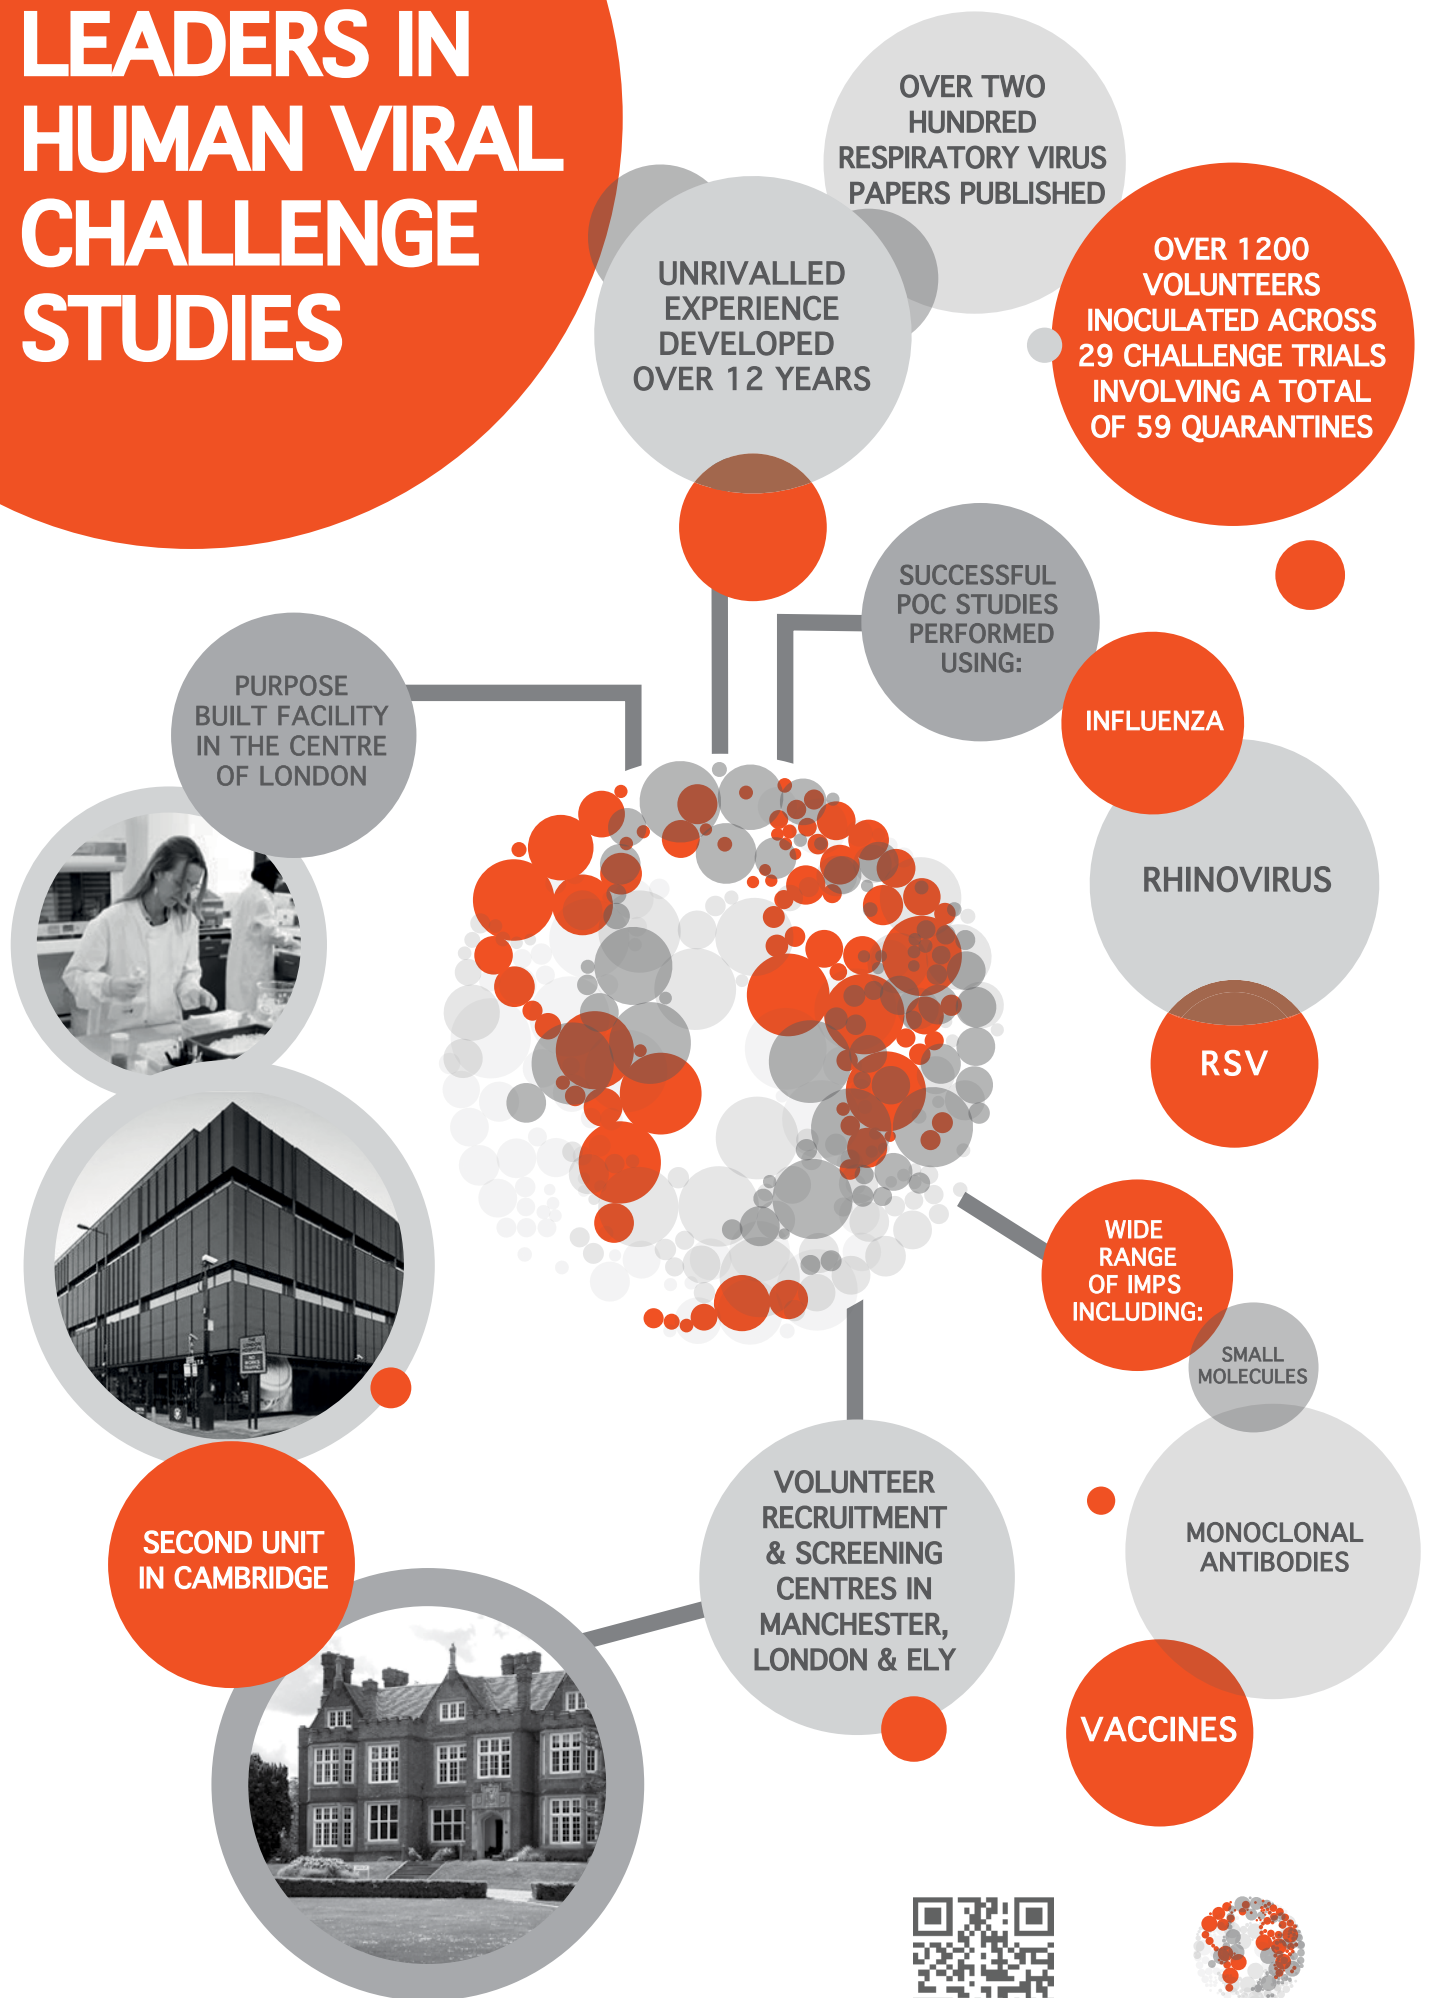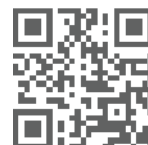

[Retroscreen.com](https://retroscreen.com)

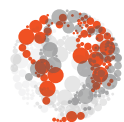

RETROSCREEN VIROLOGY  
CONQUERING VIRAL DISEASE

# Organizing Committee

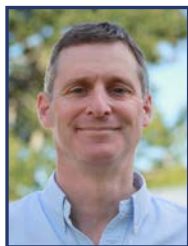

**Marc Mendelson**  
Conference Chairman  
President, Federation of  
Infectious Diseases Societies  
of Southern Africa  
Principal Specialist and Head  
Division of Infectious Diseases &  
HIV Medicine  
Groote Schuur Hospital  
University of Cape Town  
Cape Town, South Africa

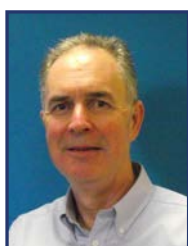

**John Watson — Organizing  
Committee, Deputy Chair**  
Chair, International Society for  
Influenza and  
Other Respiratory Virus Diseases  
(**isirv**)  
Director, Respiratory Diseases  
Department  
Health Protection Agency  
Centre for Infections  
London, United Kingdom

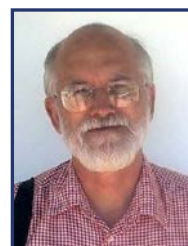

**Neil Cameron — Organizing  
Committee Co-Chair**  
Division of Community Health  
Department of Interdisciplinary  
Health Sciences  
Faculty of Health Sciences  
Stellenbosch University  
Stellenbosch, South Africa

**William Ampofo**  
National Influenza Laboratory  
Virology Department  
Noguchi Memorial Institute for Medical Research  
University of Ghana, Legon  
Accra, Ghana

**Lucille Blumberg**  
Assistant Professor  
Deputy Director  
National Institute for Communicable Diseases  
of the National Health Laboratory Services  
Johannesburg, South Africa

**Sylvie Briand**  
Team Leader  
Global Influenza Programme  
Health Security and Environment  
World Health Organization  
Geneva, Switzerland

**Rick Bright**  
Acting Deputy Director, Influenza Division  
Acting Chief, Antivirals Advanced Development  
Director, International Program  
DHHS/OS/ASPR/BARDA  
Washington, DC, USA

**Lorena Brown**  
Associate Professor  
Department of Microbiology  
University of Melbourne  
Parkville, Australia

**Ilaria Capua**  
Head of Virology Department  
OIE/FAO Reference Laboratory for Newcastle Disease  
and Avian Influenza  
Istituto Zooprofilattico Sperimentale delle Venezie  
Legnaro, Padova, Italy

**Cheryl Cohen**  
Pathologist/Epidemiologist  
Epidemiology and Surveillance Unit  
National Institute for Communicable Diseases  
Gauteng, South Africa

**Nancy Cox**  
Director, Influenza Division  
Director, WHO Collaborating Center for Surveillance  
Epidemiology and Control of Influenza  
Coordinating Center for Infectious Diseases  
Centers for Disease Control and Prevention  
Atlanta, GA, USA

**Brad Gessner**  
Scientific Director  
Agence de Médecine Préventive  
Paris, France

**Alan Hampson**  
Editor in Chief, *Influenza and other Respiratory Viruses*  
Interflu Pty Ltd  
Chairman, Influenza Specialist Group  
Victoria, Australia

**Lance Jennings**  
Clinical Associate Professor  
Virology and Serology Department  
Microbiology Health Laboratories  
Canterbury Health Laboratories  
Christchurch, New Zealand

**Peter Palese**  
Horace W. Goldsmith Professor and Chair  
Department of Microbiology  
Professor, Department of Medicine  
Mount Sinai School of Medicine  
New York, NY, USA

**Gavin Smith**  
Associate Professor  
Program in Emerging Infectious Diseases  
Duke-NUS Graduate Medical School  
Singapore

**John Wood**  
Doctor  
National Institute for Biological Standards and Control  
(Retired)  
Potters Bar, United Kingdom

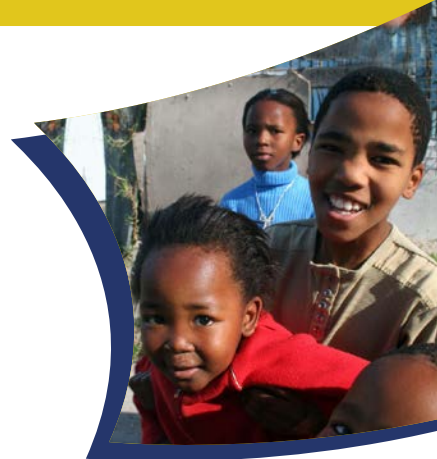

# Scientific Committee

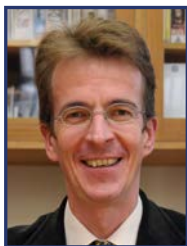

**Wolfgang Preiser** — Scientific Committee Co-Chair  
Head, Division of Medical Virology  
Department of Pathology  
Faculty of Health Sciences  
Stellenbosch University and National Health Laboratory Service  
Stellenbosch, South Africa

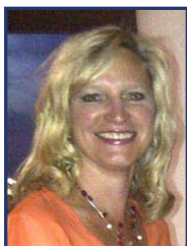

**Stacey Schultz-Cherry** — Scientific Committee Co-Chair  
Associate Member  
Department of Infectious Diseases  
St. Jude Children's Research Hospital  
Memphis, TN, USA

**Wendy Barclay**  
Professor  
Chair in Influenza Virology  
Imperial College London  
London, United Kingdom

**Fred Hayden**  
Professor of Medicine  
Stuart S. Richardson Professor of Clinical Virology  
University of Virginia School of Medicine  
Charlottesville, VA, USA

**Eddie Holmes**  
Professor  
Department of Biology  
Pennsylvania State University  
University Park, PA, USA

**Jackie Katz**  
Chief  
Immunology and Pathogenesis Branch  
Influenza Division  
National Center for Immunization and Respiratory Disease  
Centers for Disease Control and Prevention  
Atlanta, GA, USA

**Anne Kelso**  
Director  
WHO Collaborating Centre for Reference and Research on Influenza  
Victoria, Australia

**Stephan Ludwig**  
Professor, Doctor  
University of Münster  
Münster, Germany

**Arnold Monto**  
Professor of Epidemiology  
University of Michigan  
School of Public Health  
Ann Arbor, MI, USA

**Jeffrey Mphahlele**  
Professor and Head  
Department of Virology  
University of Limpopo  
Medunsa, South Africa

**Kristen Nicol**  
Professor of Medicine  
University of Minnesota  
Associate Chief of Staff for Research  
Minneapolis VA Medical Center  
Minneapolis, MN, USA

**Albert Osterhaus**  
Professor  
Head, Department of Virology  
Erasmus University Rotterdam  
Rotterdam, The Netherlands

**Malik Peiris**  
Professor  
Department of Microbiology  
The University of Hong Kong  
Hong Kong SAR, China

**Derek Smith**  
Professor  
University of Cambridge  
Cambridge, United Kingdom

**Sylvie van der Werf**  
Director of Molecular Genetics of RNA Viruses Unit  
Institut Pasteur  
Paris, France

**Marietjie Venter**  
Associate Professor  
Head, Respiratory Virus Unit  
National Influenza Centre  
National Institute for Communicable Diseases and Respiratory and Zoonotic Virus Programme  
Department of Medical Virology  
University of Pretoria  
Pretoria, South Africa

**Veronika von Messling**  
Associate Professor  
Emerging Infectious Diseases Program  
Duke-NUS Graduate Medical School Singapore  
Singapore

**Maria Zambon**  
Head  
Enteric and Respiratory Virus Laboratory  
Public Health Laboratory Services  
London, United Kingdom

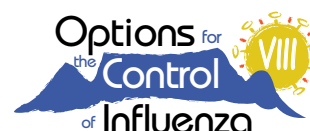

Cape Town, South Africa • 5-10 September 2013

# Supporters

The *Options for the Control of Influenza VIII* Organizing Committee and Scientific Program Committee sincerely thank the following exhibitors and sponsors for their participation in *Options VIII*.

Exhibitors and Supporters:

BILL & MELINDA  
GATES *foundation*

SANOFI PASTEUR 

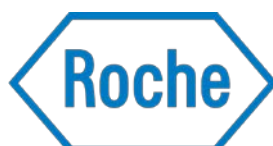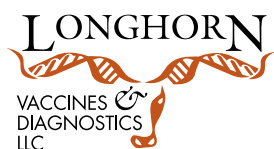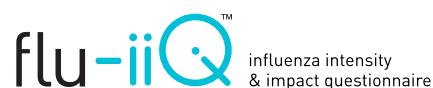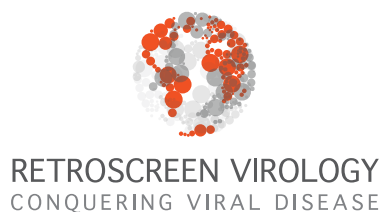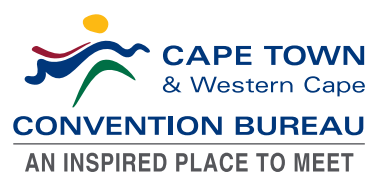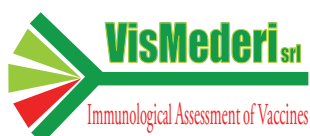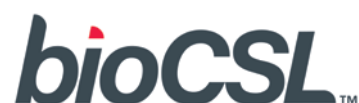

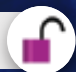

# Influenza

## and other respiratory viruses

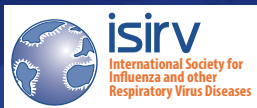

The Official Journal of the International Society for Influenza and other Respiratory Virus Diseases

Edited by Alan W. Hampson

In 2014 *Influenza and Other Respiratory Viruses* will join the Wiley Open Access program of fully open access journals published by Wiley.

Manuscripts accepted for publication will be published as open access articles, immediately free to read, download and share. Authors or their funder will be required to pay an Article Publication Charge upon acceptance.

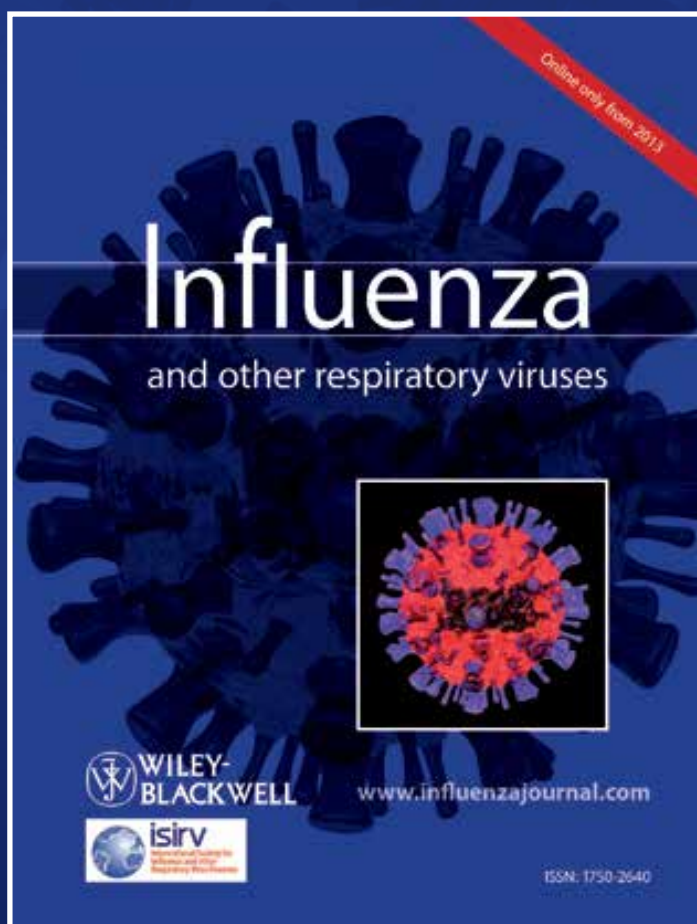

For more information, visit  
**[www.influenzajournal.com](http://www.influenzajournal.com)**

# Scholarship Award Winners

## Bill and Melinda Gates Foundation Fellowship Recipients

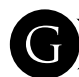

FELLOWSHIP

GATES  
Fellowship

### **Agare Adamou, P2-625**

Centre de Recherche Medicale et Sanitaire, Niger  
Influenza surveillance among cases with influenza-like illness and severe acute respiratory illness in Niger, 2009-2012

### **Mejbah Bhuiyan, P1-424**

icddr,b, Bangladesh  
The role of community-acquired influenza patients and healthcare workers in transmitting influenza infections in tertiary hospitals in Bangladesh

### **Timothy Byaruhanga, P1-329**

National Influenza Centre, Uganda  
Assessing the burden of influenza in relation to age, its impact on out-patients and hospitalized patients: a case study in Uganda

### **Mamoona Chaudhry, LBA-P2-047**

University of Veterinary and Animal Sciences, Pakistan  
Prevalence of avian influenza and associated risk factors in live birds retail stalls of Lahore district, Pakistan

### **Abrar Chughtai, P1-416 and P1-417**

Home country: Pakistan, Current: University of New South Wales Sydney, Australia  
Availability, consistency and evidence-base of policies and guidelines on the use of mask and respirator to protect hospital health care workers: a global analysis  
Use of cloth masks in the practice of infection control – evidence and policy gaps

### **Radu Cojocaru, LBA-P2-017**

National Centre for Public Health, Republic of Moldova  
Strengthening of the surveillance system for Influenza, ARI and SARI in the Republic of Moldova

### **Martin Herbas Ekot**

Cheik Anta Diop University, Senegal

### **Narendra Gemawat**

Hindustan Chamber Chikitsalaya, India

### **Lionel Gresh**

Sustainable Sciences Institute, Nicaragua

### **Phuong Hoang, P2-518**

National Influenza Center, Vietnam  
The genetic match between vaccine strains and circulating seasonal influenza A viruses in Vietnam, 2001-2009

### **Iaryna Iosyk, LBA-P2-011**

I. Ya. Horbachevsky Ternopil State Medical University, Ukraine  
Etiological structure of acute respiratory viral infections in among epidemical period and treatment

### **Md. Saiful Islam, P2-469**

icddr,b, Bangladesh  
Poultry-human interactions in a wholesale live bird market in Dhaka, Bangladesh: the potential for bird-to-human transmission of avian influenza viruses

### **Khanthamaly Viengphone**

US Centers for Disease Control and Prevention  
Lao People's Democratic Republic

### **Binod Kumar, P2-696**

Vallabhbhai Patel Chest Institute University of Delhi, India  
Sequence-specific cleavage of influenza A virus M2 gene transcript by circular DNAszymes: prolonged inhibition of viral RNA translation and replication

### **Issaka Maman, P2-631**

Institut National D'Hygiene, Togo  
Implementation of influenza-like-illness sentinel surveillance in Togo

### **Abdullah Mamun, P2-674**

Home country: Bangladesh, Current: University of British Columbia, Canada  
Influenza among people of 50 years and above: national influenza surveillance in Bangladesh, 2008-2012

### **Clement Meseko**

National Veterinary Research Institute, Nigeria

### **Jolynne Mokaya, P1-120**

University of Nairobi, Kenya  
Influenza virus infection in Kenya

### **Jayati Mullick, P1-252**

National Institute of Virology, India  
Genetic analysis of low pathogenic avian influenza H4N6 and H9N2 viruses circulating in West Bengal, India reveals genetic diversity

### **Huong Giang Ngo, LBA-P2-012**

National Institute of Hygiene and Epidemiology, Vietnam  
Oseltamivir resistance among influenza viruses: surveillance in northern Viet Nam, 2009-2012

### **Thach Nguyen, P2-594**

National Institute of Hygiene and Epidemiology, Vietnam  
Evolution and diversity of HPAI H5N1 clade 2.3.4 in Vietnam from 2005 to 2010

Rogan Taboko Nyenti  
Cameroon Medical Women Association, Cameroon

Stephen Ocholla  
US Army Medical Research Unit, Kenya

Abdoulaye Ouattara, P2-689  
Institute Pasteur de Cote d'Ivoire, Côte d'Ivoire  
Non-influenza viral etiology associated with acute  
respiratory infection in children under five years in Cote  
d'Ivoire

Shailesh Pawar, P1-402  
National Institute of Virology – MCC, India  
Inactivation of infectivity of avian influenza viruses using  
BPL, formalin and ether for preparation of candidate  
vaccines

Kimbowe Peter, P1-258  
Joint Clinical Research Center, Uganda  
Proteinase-inhibitor theory of pathogenesis of influenza

Noroso Razanajatova, O-987  
Institut Pasteur, Madagascar  
Etiology of Two-years Hospital-based Surveillance of  
Severe Acute Respiratory Infection in Madagascar

Naila Siddique, P2-472 and P2-579  
National Reference Lab for Poultry Diseases NARC,  
Pakistan  
Sequence and phylogenetic comparison of human and  
avian Influenza H3 strains reveals introduction of American  
and Eurasian lineages in Pakistan  
Isolation and sequence analysis of reassortant low  
pathogenic Avian Influenza virus H4N6 from Duck and  
Chicken in live bird markets of Pakistan

Karhemere Stomy, LBA-P2-034  
Institut National de Recherche Biomedicale (INRB), The  
Democratic Republic of the Congo  
Evaluation of the influenza sentinel surveillance system,  
Kinshasa, DR Congo, 2009- 2011

Gelila Tiyo, P2-663  
Ethiopian Health Nutrition Research Institute, Ethiopia  
Influenza surveillance at IU sentinel sites in Addis Ababa,  
Ethiopia: epidemiological and virological findings from  
2012

Makanga Tonny  
Center for HIV, STD & TB Prevention, Uganda

Erdene-Ochir Tseren-Ochir, P2-589  
State Central Veterinary Laboratory, Mongolia  
The characterization and pathogenicity of H5N1 highly  
pathogenic avian influenza virus strains isolated from  
migratory wild birds in Mongolia (2005-2010)

Bishnu Prasad Upadhyay, P2-455  
National Public Health Laboratory, Nepal  
Molecular epidemiology and serological characterization of  
influenza virus infection in Nepal

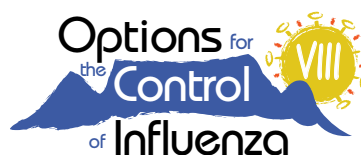

## Promising Investigator Scholarship Recipients

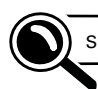

SCHOLARSHIP

### Promising Investigator Scholarship

Aubree Gordon, P1-119 and O-869  
Business/Institution University of California Berkeley,  
United States  
The Nicaraguan Influenza Birth Cohort Study: methods  
and results from the first year  
Household Transmission of Influenza in Nicaragua

Erik Karlsson, LBA-P2-028, LBA-P2-029, P2-496, and O-838  
St Jude Children's Research Hospital, United States  
Pathological and immunological comparison of H5N1 and  
H7N9 viruses in mice

The use of statins to combat viral and bacterial pneumonia in  
obese mice

Risk analysis of a novel avian H3N8 virus isolated from harbor  
seals

The obese host as a driver of influenza virus evolution

Florian Krammer, P2-548  
Icahn School of Medicine at Mount Sinai, United States  
A universal influenza virus vaccine based on the stalk domain  
of the hemagglutinin

Kristin G-I Mohn, O-862  
University of Bergen, Norway  
A study of the local and systemic immune responses after  
intranasal influenza vaccination in children

Philippe Noriel Pascua, O-873  
Chungbuk National University, Republic of Korea  
Characterization of H3N2pM-like and novel reassortant H3N1  
swine viruses with pandemic H1N1 2009-like segments  
isolated in Korea

Saranya Sridhar, P1-360 and O-824  
Imperial College of London, United Kingdom  
CD8+ T cells correlate with protection against symptomatic  
illness following natural pandemic influenza infection in  
humans

Higher incidence of pandemic influenza natural infection in  
the third wave compared to the second wave in an adult  
community cohort in the UK

Sophie Valkenburg , O-879  
The University of Hong Kong, China  
Universal influenza vaccine requires CD4+ T cells for  
heterosubtypic protection

Carolien van de Sandt, O-853  
Erasmus MC, Netherlands  
Human cytotoxic T lymphocytes directed to seasonal influenza  
A viruses cross-react with the newly emerging H7N9 virus

Debby van Riel, P1-115  
Erasmus MC, Netherlands  
Novel avian-origin influenza A (H7N9) virus attaches to  
epithelium in both upper and lower respiratory tract of  
humans

Huachen Zhu, P1-110  
The University of Hong Kong, China  
The emergence of the 2013 H7N9 and related viruses in  
China

## International Research Scholarship Recipients

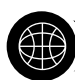

SCHOLARSHIP

International Research  
Scholarship

### Fahmida Chowdhury, O-903

Respiratory Viruses Research Group, Centre for Communicable Diseases, icddr,b, Bangladesh  
Drug dispensing practices for acute respiratory infections and availability of oseltamivir through pharmacies, in Dhaka, Bangladesh

### Doudou Diop, P1-164

Institut de Recherche pour le Développement, Senegal  
Informing future policy for influenza vaccination programs in sub-Saharan Africa: forging a path for decision-making

### Gideon Emukule, O-804, O-847, P1-406, & P2-614

Kenya Medical Research Institute/Centers for Disease Control and Prevention (KEMRI/CDC), Kenya  
The role of HIV in the household introduction and transmission of influenza in an urban setting, Nairobi, Kenya, 2008-2011

The Burden of Influenza and RSV among inpatients and outpatients in Rural Western Kenya, 2009 -2012  
Uptake and effectiveness of a trivalent inactivated influenza vaccine in urban and rural Kenya, 2010-2012  
Predicting mortality among hospitalized children with respiratory illness in Western Kenya, 2009 -2012

### Pedro Jimenez-Bluhm, O-909

University of Wisconsin-Madison, United States  
Surveillance and characterization of Influenza viruses circulating in the central region of Chile

### Hoa Le, O-856

Oxford University Clinical Research Unit, Vietnam  
Protection against influenza infection was associated with neutralizing antibodies detected in the absence of HI antibodies for pandemic H1N1 but not for H3N2 in a natural infection cohort

### Amalya Mangiri, P2-495 and P2-615

US CDC Jakarta Office, Indonesia  
Did intensified surveillance lead to increased detection of human infections with highly pathogenic avian influenza A(H5N1) virus in East Jakarta, Indonesia?  
Physician's knowledge, attitudes, and practices for pandemic, seasonal and avian influenza in Indonesia

### Richard Njouom, P2-619

Sanofi Pasteur, Cameroon  
Influenza viruses in Cameroon: 5 years of sentinel surveillance data, 2007-2012

### Paul Simusika, P2-627

University Teaching Hospital, Zambia  
Etiology of severe acute respiratory infections among hospitalized children in Lusaka, Zambia, 2011-2012

### Rahul Srivastava, O-885

All India Institute of Medical Sciences, India  
Do case definitions affect the prediction of influenza virus in different seasons in north India?

### Babasaheb Tandale, P1-131

National Institute of Virology, India  
Investigation of human infections during H5N1 crow outbreaks in Jamshedpur, India

# Options VIII Information

*Options VIII* will provide the opportunity for interdisciplinary discussions both within and outside the formal scientific program of the conference. Presentations and session topics have been designed to maximize the opportunities for informal discussions and exchange of ideas between representatives of government agencies, academia, and industry. The conference promotes interactions between basic and applied scientists, public health practitioners, and policy makers interested in mitigating the impact of influenza.

## Who Should Attend:

- Physicians
- Scientists
- Clinicians
- Public health specialists
- Researchers
- Epidemiologists
- Vaccine experts
- Health education specialists
- Healthcare policy makers
- Government officials
- Concerned business leaders
- Medical and scientific media

## Conference Goals and Objectives:

- Provide comprehensive scientific guidance for all stakeholders involved in influenza prevention, control, and treatment, including seasonal pandemic planning
- Promote genuine international and multidisciplinary collaboration, supporting the full spectrum of influenza research, from basic science to the development of new vaccines and antiviral agents to epidemiology and control programs
- Provide a collegial atmosphere where scientists working in public health and scientists working in agricultural or veterinary agencies can exchange information to develop collaborative approaches to the control and prevention of pandemic influenza
- Maximize opportunities for informal discussions and exchange of ideas between representatives of government agencies, academia, and industry

## Registration and Information Desk

The registration and information desk is located on the ground floor level of the Cape Town International Convention Centre.

| Registration Hours     |             |
|------------------------|-------------|
| Wednesday, 4 September | 08.00-18.00 |
| Thursday, 5 September  | 08.00-18.00 |
| Friday, 6 September    | 08.00-18.00 |
| Saturday 7 September   | 07.00-13.00 |
| Sunday, 8 September    | 08.00-18.00 |
| Monday, 9 September    | 08.00-18.00 |

## Welcome Reception

Thursday, 5 September  
17.30—19.30

Sponsored by Wesgro/the Cape Town and Western Cape Convention Bureau

Please join us in the Exhibition Hall for a traditional Cape Town Minstrel Parade. Singers, dancers, and musicians dressed in traditional costumes will open the Exhibition Hall in true Cape Town fashion. Face painting, crafts vendors, and a cappella choirs will create a multifaceted welcome celebration that will not be soon forgotten. The *Options VIII* organizers support local organizations; Kwazinto Crafts is a small poverty-alleviation organization that promotes the artworks of disadvantaged craftspeople. Please visit their table in the Exhibition Hall as they display a collection of authentic African craftsmanship for purchase.

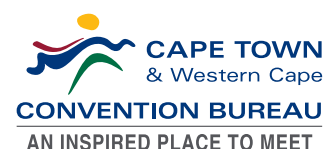

## Language

English is the official language of *Options VIII*, and all oral presentations will be in English.

## Exhibit Hall

| Exhibition Hall Hours           |             |
|---------------------------------|-------------|
| Thursday, 5 September           | 17.30-19.30 |
| Friday, 6 September             | 09.00-21.00 |
| <i>Poster Walkabout Session</i> | 18.30-21.00 |
| Saturday, 7 September           | 09.00-12.00 |
| Sunday, 8 September             | 09.00-21.00 |
| <i>Poster Walkabout Session</i> | 17.30-21.00 |
| Monday, 9 September             | 09.00-16.00 |

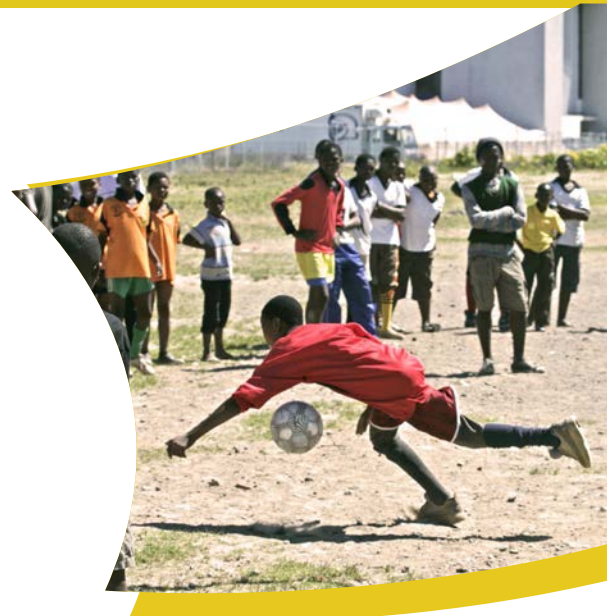

## NEW Walkabout Sessions

*Options VIII* is pleased to present a new feature during the poster receptions, Poster Walkabout Sessions. Scientific Chairs seek to further showcase high-quality abstracts and enhance the prominence of work presented as posters. These sessions will be chaired by experts in the respective fields who will lead groups of interested scientists from poster to poster in each thematic group. Poster authors will have the opportunity to talk briefly about the essence of their work from the poster presentation area. This is an opportunity for young investigators to meet the leaders in the field of influenza in a less formal, more collegial setting. We invite delegates to join us in the poster area at the designated times and take part in the presentation and discussion.

## Speaker Ready Room

A Speaker Room will be accessible for speakers to review their presentations in Meeting Room 1.52 located on Level One of the convention centre. Speakers may gain access to the speaker ready room beginning on 4 September 2013 at 09.00. Please note that all slides and presentations must be uploaded prior to the presentation. Under no circumstances will presentations be uploaded in the general session room on the day of the presentation.

| Speaker Ready Room Hours |             |
|--------------------------|-------------|
| Wednesday, 4 September   | 08.00-18.00 |
| Thursday, 5 September    | 08.00-18.00 |
| Friday, 6 September      | 08.00-18.00 |
| Saturday, 7 September    | 08.00-13.00 |
| Sunday, 8 September      | 08.00-18.00 |
| Monday, 9 September      | 08.00-18.00 |

## Satellite Symposium

A Satellite Symposium will take place in the Cape Town Convention Center in Ballroom West on Level One on Friday, 6 September 2013 during lunch (13.00-15.00). Boxed lunches will be served. Space is limited and delegates will be seated on a first-come, first-served basis. Sponsored by Sanofi Pasteur.

### First Aid Station

A first aid station will be available in the Cape Town International Convention Centre on Level P3 for minor health issues. Please visit the ER 24 Medi Clinic one level down from the registration area.

### Currency

Currency exchange services are available at the front desk of the various conference hotels.

### Attire

Attire for the conference is business casual. Conference rooms are often cool. *Options VIII* organizers recommend that you bring a light sweater or jacket in case of cool conditions.

### Press Office

The *Options VIII* Press Office is located on Level One in Meeting Room 1.53. Delegates with a press badge may use the press office between the hours of 09.00-18.00, 5-9 September, 2013.

### Conference Bags

The *Options VIII* conference bags are produced by **Township Patterns**, an independent women's cooperative based in the Townships and Cape Flats of Cape Town. *Options VIII* is proud to work with an organization providing women with the training and business skills required to create independent sewing cooperatives. A unique social enterprise based in Cape Town, Township Patterns is a member of the World Fair Trade Organisation and products are crafted by local township seamstresses. The conference bags are made of 100% African cotton fabric and natural materials. The Organizing and Scientific Committees gratefully acknowledge the *Options VIII* conference bag supporter bioCSL.

**bioCSL**

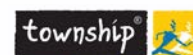

*Options VIII* is committed to supporting local economic development in South Africa. Conference items have been purchased locally whenever possible.

### isiv Annual General Meeting

The **isiv** annual general meeting will take place on Saturday, 7 September 2013 at 12.00 in Ballroom East. It will immediately follow the Feature Cornerstone Session and last for approximately 30-45 minutes. Obtain information about the society, meet the existing board members, and be sure to participate in the Board Member Elections. All paid full-conference registrants receive a complimentary 1-year membership to **isiv**, so please stay and discover the benefits of membership. **Make this one of the events that you definitely attend.**

### Post-Conference Proceedings

All authors of accepted abstracts are invited to submit optional complete manuscripts for further review by the Scientific Committee for print in the conference proceedings. The *Options VIII* conference proceeding will be distributed via CD-ROM and available for download from the **isiv** website.

For more information regarding manuscript submission process, please see the conference website:

[www.controlinfluenza.com](http://www.controlinfluenza.com)

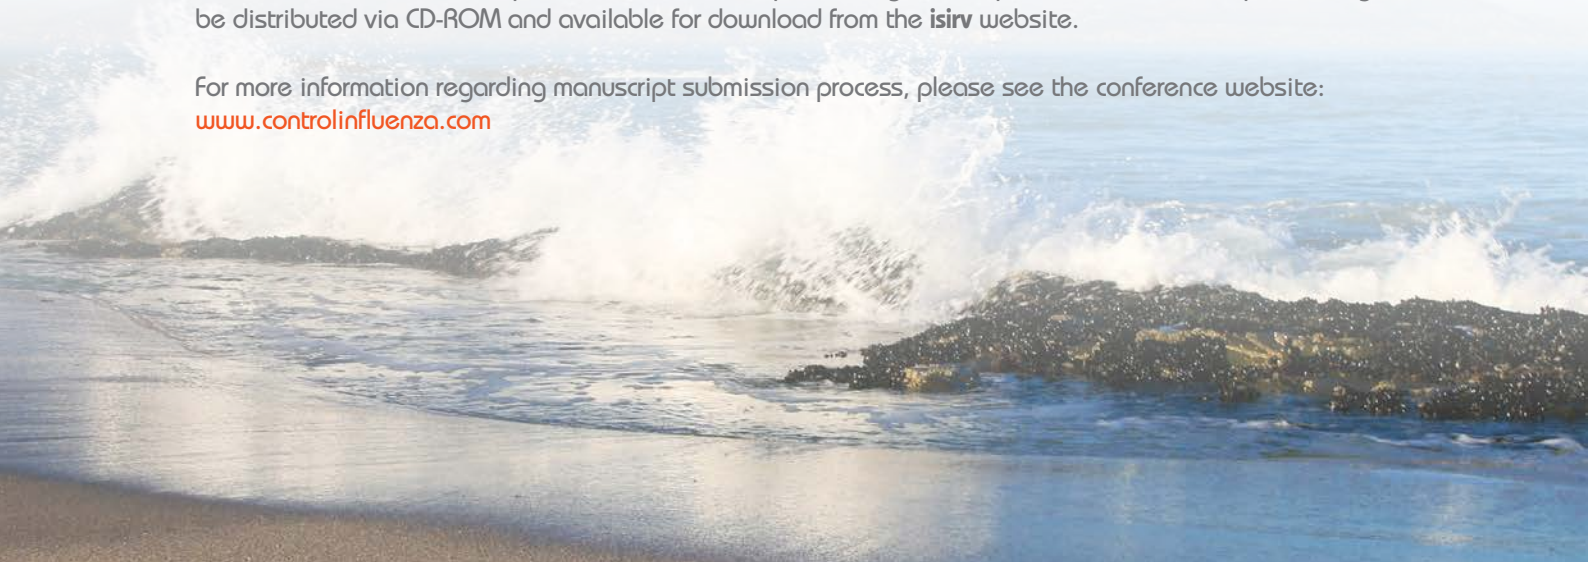

# Options VIII Floorplan

1. GISAIID Initiative
2. International Society for Influenza and other Respiratory Virus Diseases (**isirv**)
3. European Scientific Working group on Influenza
4. Quidel
5. MESH (Measured Solutions for Health P/L)
7. Longhorn Vaccines
8. Roche
9. Sanofi Pasteur

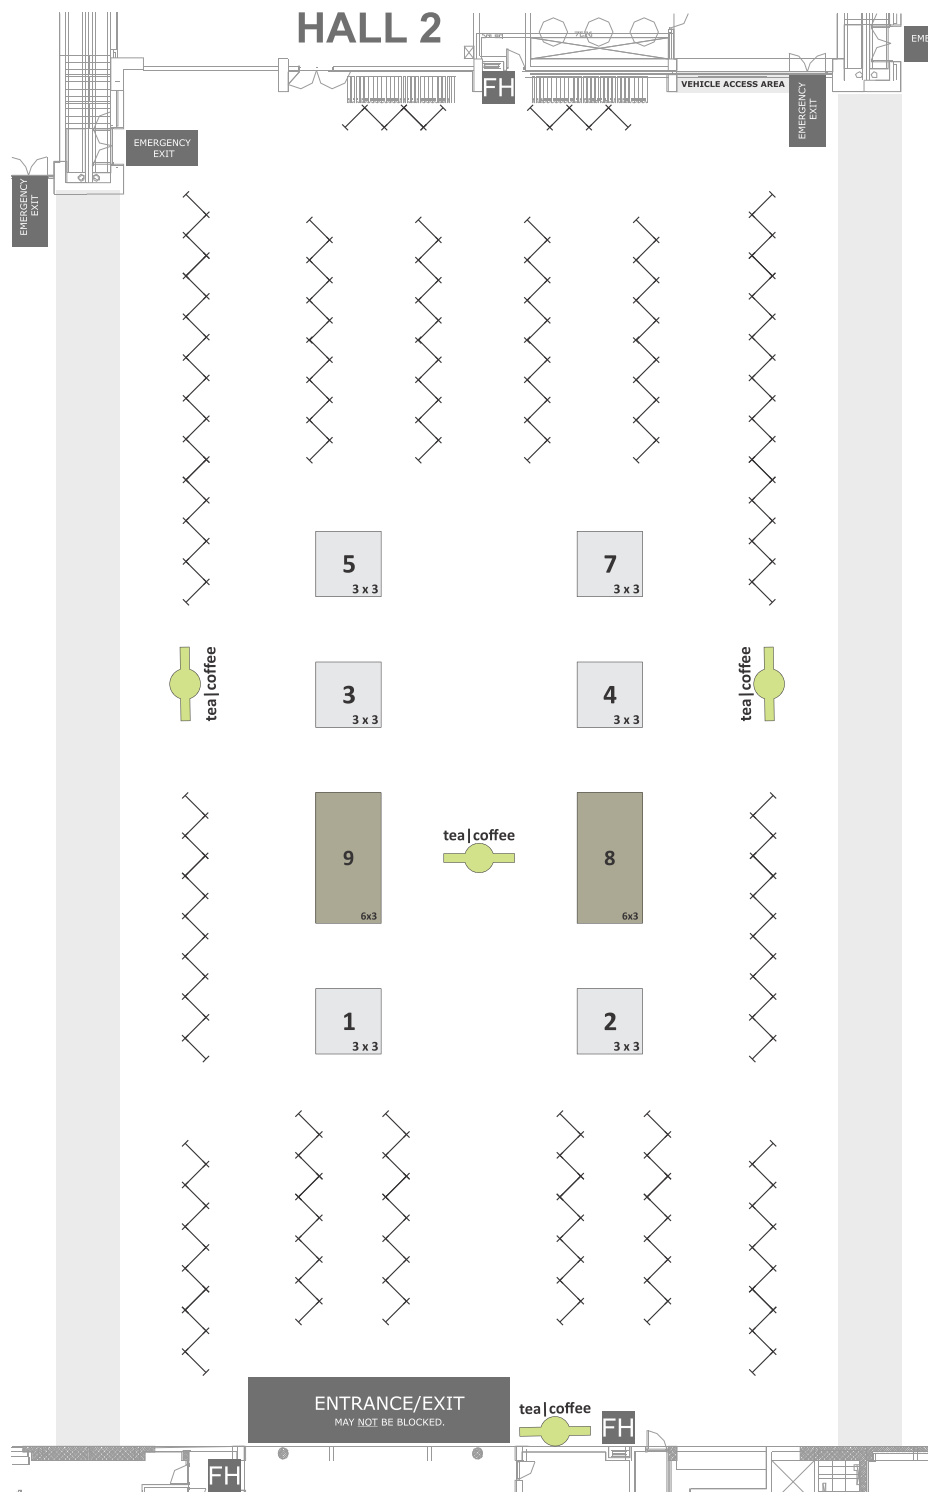

| Options VIII Programme |                             |                                                                                                                                                                                                                                                                                                                                                                                                                                                                                                                                                                                            |                                                                                                                                                                                                                                                                                                                                                                                                                                                                                                                     |
|------------------------|-----------------------------|--------------------------------------------------------------------------------------------------------------------------------------------------------------------------------------------------------------------------------------------------------------------------------------------------------------------------------------------------------------------------------------------------------------------------------------------------------------------------------------------------------------------------------------------------------------------------------------------|---------------------------------------------------------------------------------------------------------------------------------------------------------------------------------------------------------------------------------------------------------------------------------------------------------------------------------------------------------------------------------------------------------------------------------------------------------------------------------------------------------------------|
|                        | Wed.<br>04 Sept             | Thu.<br>05 Sept                                                                                                                                                                                                                                                                                                                                                                                                                                                                                                                                                                            | Fri.<br>06 Sept                                                                                                                                                                                                                                                                                                                                                                                                                                                                                                     |
| 08.00                  | Registration<br>08.00-18.00 |                                                                                                                                                                                                                                                                                                                                                                                                                                                                                                                                                                                            |                                                                                                                                                                                                                                                                                                                                                                                                                                                                                                                     |
| 09.00-09.40            |                             | <b>Opening Ceremony</b><br><i>Welcome from Congress and isirv Chairs</i><br><i>Wecome: The Honorable Aaron Motsoaledi Minister of Health-South Africa Cape Town, South Africa</i><br><i>Opening Presentation: Robert Webster, St Jude's Children Research Hospital, Memphis, Tennessee, USA</i>                                                                                                                                                                                                                                                                                            | <b>Cross-Cutting Keynote:</b><br><b>The Interaction between influenza and lung co-pathogens</b><br><i>Keith Klugman, Department of Global Health at the Rollins School of Public Health at Emory University, Atlanta, Georgia, USA</i>                                                                                                                                                                                                                                                                              |
| 09.40-11.00            |                             | <b>Morning plenary session 1—Virology</b><br><br><b>vRNP structure and how does the polymerase work</b><br><i>Speaker: Yoshihiro Kawaoka, University of Wisconsin, School of Veterinary Medicine, Madison, USA</i><br><b>PA-x and PB1-N40</b><br><i>Paul Digard, The Roslin Institute, University of Edinburgh, Scotland</i><br><b>Importins and their role in host restriction of avian influenza viruses</b><br><i>Gülsah Gabriel, Heinrich-Pette-Institute, Leibniz Institute for Experimental Virology, Hamburg, Germany</i>                                                           | <b>Morning plenary session 2—Epidemiology</b><br><br><b>Maternal Influenza Immunization</b><br><i>Saad Omer, Emory University, Schools of Public Health and Medicine, Atlanta, Georgia, USA</i><br><b>Epidemiology of influenza in Africa</b><br><i>Cheryl Cohen, NICD, Cape Town, South Africa</i><br><b>Challenges to estimating influenza mortality/severity</b><br><i>Anthony Mounts, Global Influenza Programme, Health Security &amp; Environment Cluster, World Health Organization, Geneva, Switzerland</i> |
| 11.00-11.30            |                             | Morning networking and refreshment                                                                                                                                                                                                                                                                                                                                                                                                                                                                                                                                                         | Morning networking and refreshment                                                                                                                                                                                                                                                                                                                                                                                                                                                                                  |
| 11.30-13.00            |                             | <b>Mid-day plenary session 1—Pathogenesis</b><br><br><b>Lung injury / ARDS</b><br><i>Malik Peiris, University of Hong Kong, Hong Kong, SAR, China</i><br><b>Overview of pathogenesis and transmission of swine influenza</b><br><i>Juergan Richt, Kansas State University, College of Veterinary Medicine, Manhattan, Kansas, USA</i><br><b>Experimental studies of influenza virus transmission in humans</b><br><i>Speaker: Jonathan Van Tam, Health Protection &amp; Influenza Research Group, Epidemiology and Public Health, University of Nottingham, Nottingham, United Kingdom</i> | <b>Mid-day plenary session 2—Immunology</b><br><br><b>Mx Restriction of influenza viruses</b><br><i>Otto Haller, University Hospital Freiburg, Freiburg, Germany</i><br><b>T cells in the respiratory tract</b><br><i>Thomas Braciale, University of Virginia, Charlottesville, Virginia, USA</i><br><b>B cells and influenza</b><br><i>Paul G. Thomas, Department of Immunology, St. Jude Children's Research Hospital, Memphis, Tennessee, USA</i>                                                                |
| 13.00-14.00            |                             | Lunch - on own                                                                                                                                                                                                                                                                                                                                                                                                                                                                                                                                                                             | 13.00-15.00                                                                                                                                                                                                                                                                                                                                                                                                                                                                                                         |
| 14.00-15.30            |                             | <b>Concurrent afternoon workshops</b><br><b>1A: News and Views from the H7N9 Outbreak</b><br><i>State of the Art Presentation: H7N9</i><br><b>1B: Epidemiology I</b><br><b>1C: Policy and Risk Communication</b>                                                                                                                                                                                                                                                                                                                                                                           | Lunch - <b>Satellite Symposium</b><br><b>Four Questions about Influenza Immunization, Sponsored by Sanofi Pasteur</b><br><br>15.00-16.30<br><br><b>Concurrent afternoon workshops</b><br><b>3A: Evolution, Systems Biology &amp; Genomics</b><br><b>3B: Antiviral Drugs and Resistance</b><br><b>3C: Disease Burden and Health Economics</b><br>16.30 – 17.00<br><br>Afternoon networking and refreshment<br>17.00 – 18.30                                                                                          |
| 15.30-16.00            |                             | Afternoon networking and refreshment                                                                                                                                                                                                                                                                                                                                                                                                                                                                                                                                                       |                                                                                                                                                                                                                                                                                                                                                                                                                                                                                                                     |
| 16.00-17.30            |                             | <b>Concurrent evening workshops</b><br><b>2A: Virology and Viral Receptors</b><br><b>2B: Epidemiology II</b><br><b>2C: Models informing Public Health and Pandemic Mitigation</b>                                                                                                                                                                                                                                                                                                                                                                                                          |                                                                                                                                                                                                                                                                                                                                                                                                                                                                                                                     |
| 17.30-19.30            |                             | <b>Welcome reception</b><br><i>(Options VIII exhibition hall 2)</i>                                                                                                                                                                                                                                                                                                                                                                                                                                                                                                                        | <b>Concurrent evening workshops</b><br><b>4A – Innate and Adaptive Immunity</b><br><b>4B – Vaccines I</b><br><b>4C – Transmission and Infection Control</b><br><br>18.30-21.00<br><br><b>Poster Reception</b><br><i>Walkabout session #1</i><br><i>(Options VIII exhibition hall 2)</i>                                                                                                                                                                                                                             |
|                        |                             |                                                                                                                                                                                                                                                                                                                                                                                                                                                                                                                                                                                            |                                                                                                                                                                                                                                                                                                                                                                                                                                                                                                                     |

## Options VIII Programme

| Sat.<br>07 Sept                                                                                                                                                                                                                                                                                                                                                                                                                                                                                                                                                                                                                                                                                                                                                                                                                                                                                                                                                                                                                                                                                                                                                                                                                                                                                                                                                                                          | Sun.<br>08 Sept                                                                                                                                                                                                                                                                                                                                                                                                                                                                                                                                                                                                                                                                                                                                                                                                                                                                  | Mon.<br>09 Sept                                                                                                                                                                                                                                                                                                                                                                                                                                                                                                                                                                                                                                                                                                                                |
|----------------------------------------------------------------------------------------------------------------------------------------------------------------------------------------------------------------------------------------------------------------------------------------------------------------------------------------------------------------------------------------------------------------------------------------------------------------------------------------------------------------------------------------------------------------------------------------------------------------------------------------------------------------------------------------------------------------------------------------------------------------------------------------------------------------------------------------------------------------------------------------------------------------------------------------------------------------------------------------------------------------------------------------------------------------------------------------------------------------------------------------------------------------------------------------------------------------------------------------------------------------------------------------------------------------------------------------------------------------------------------------------------------|----------------------------------------------------------------------------------------------------------------------------------------------------------------------------------------------------------------------------------------------------------------------------------------------------------------------------------------------------------------------------------------------------------------------------------------------------------------------------------------------------------------------------------------------------------------------------------------------------------------------------------------------------------------------------------------------------------------------------------------------------------------------------------------------------------------------------------------------------------------------------------|------------------------------------------------------------------------------------------------------------------------------------------------------------------------------------------------------------------------------------------------------------------------------------------------------------------------------------------------------------------------------------------------------------------------------------------------------------------------------------------------------------------------------------------------------------------------------------------------------------------------------------------------------------------------------------------------------------------------------------------------|
| <b>Feature Cornerstone Session: Animal-Human Interface</b><br><b>Mammalian adaptation of influenza viruses: what we know and what we don't</b><br><i>Terrence Tumpey, Immunology and Pathogenesis Branch, Influenza Division, Centers for Disease Control and Prevention, Atlanta, Georgia, USA</i><br><b>Ecology, evolution, and human health risks from emerging swine influenza viruses</b><br><i>Richard Webby, Infectious Diseases, St Jude Children's Research Hospital, Memphis, Tennessee, USA</i><br><b>Risk assessing animal viruses for pandemic threat</b><br><i>Nancy Cox, WHO Collaborating Center for Surveillance Epidemiology and Control of Influenza, National Center for Immunization and Respiratory Diseases, Coordinating Center for Infectious Disease, Influenza Division, Centers for Disease Control and Prevention, Atlanta, Georgia, USA</i><br><b>Human H5N1 and H7N9 Disease or Human Disease with Avian Viruses (H5, H7, H9, even H6)</b><br><i>Peter Horby, Oxford University Clinical Research Unit, - Wellcome Trust Major Overseas Programme, Hanoi, Vietnam; Singapore Infectious Diseases Initiative, Singapore</i><br><b>The pros and cons of GOF studies</b> <ul style="list-style-type: none"> <li>Yoshihiro Kawaoka</li> <li>Charles Russell</li> <li>Adolfo Garcia-Sastre</li> <li>Michael Osterholm</li> <li>Marc Lipsitch</li> <li>Jessica Bloom</li> </ul> | <b>Cross-Cutting Keynote:</b><br><b>Universal epitopes, their application to vaccines and therapy and importance in influenza epidemiology</b><br><i>Speaker: Peter Palese, Icahn School of Medicine at Mount Sinai, New York, New York, USA</i><br><br><b>Morning plenary session 3—Diagnostics</b><br><b>Real-time PCR</b><br><i>Stephen Lindstrom, National Center for Immunization for Respiratory Diseases, CDC, Atlanta, Georgia, USA</i><br><b>Influenza whole genome analysis and its role in diagnostics, patient care and public health</b><br><i>Monica Galiano, Health Protection Agency, London, United Kingdom</i><br><b>Clinical relevance of influenza viral load measurement</b><br><i>Nelson Lee, Stanley Ho Center for Emerging Infectious Diseases, The Chinese University of Hong Kong, Hong Kong, SAR, China</i><br><br>Morning networking and refreshment | <b>Cross-Cutting Keynote:</b><br><b>Host genetics of human influenza</b><br><i>Paul Kellam, Wellcome Trust Sanger Institute, Hinxton, Cambridge, United Kingdom</i><br><br><b>Morning plenary session 4—Therapeutic Interventions</b><br><b>Overview of existing therapies/clinical experience with neuraminidase inhibitors</b><br><i>Michael Ison, Northwestern University, Evanston, Illinois, USA</i><br><b>Overview of the role of immunomodulation, cellular factors and proteases</b><br><i>Béatrice Riteau, Faculte de Medecine de Laennec, Unité VirPathFrance Lyon, France</i><br><b>Polymerase inhibitors</b><br><i>Martin Schwemmle, University Hospital Freiburg, Freiburg, Germany</i><br><br>Morning networking and refreshment |
| Scholarship awards ceremony                                                                                                                                                                                                                                                                                                                                                                                                                                                                                                                                                                                                                                                                                                                                                                                                                                                                                                                                                                                                                                                                                                                                                                                                                                                                                                                                                                              | <b>Mid-day plenary session 3—Clinical</b><br><br><b>Brave and ISARIC: New Paradigms for responding to global respiratory threats</b><br><i>Nahoko Shindo, World Health Organization, Geneva, Switzerland</i><br><b>Influenza and pregnancy</b><br><i>Shigeru Saito, Department of Obstetrics and Gynecology, Graduate School of Medicine and Pharmaceutical Science for Research, University of Toyama, Toyama Prefecture, Japan</i><br><b>The many faces of influenza</b><br><i>Fred Hayden, University of Virginia, School of Medicine, Charlottesville, Virginia, USA</i><br><br>Lunch - on own                                                                                                                                                                                                                                                                               | <b>Mid-day plenary session 4—Vaccines</b><br><br><b>Overview of vaccine effectiveness issues and controversies</b><br><i>Alain Moren, EpiConcept, Paris France</i><br><b>Next generation of influenza vaccines</b><br><i>Rick Bright, HHS/OS/ASPRA BARDA, Washington, District of Columbia, USA</i><br><b>Clinical aspects in the development and licensing of the Russian-based live attenuated influenza vaccines for pandemic influenza preparedness in developing countries</b><br><i>Larisa Rudenko, Institute of Experimental Medicine of the NorthWest Branch of the Russian Academy of Medical Sciences, St Petersburg, Russia</i><br><br>Lunch - on own                                                                               |
| 12.00-13.00                                                                                                                                                                                                                                                                                                                                                                                                                                                                                                                                                                                                                                                                                                                                                                                                                                                                                                                                                                                                                                                                                                                                                                                                                                                                                                                                                                                              |                                                                                                                                                                                                                                                                                                                                                                                                                                                                                                                                                                                                                                                                                                                                                                                                                                                                                  |                                                                                                                                                                                                                                                                                                                                                                                                                                                                                                                                                                                                                                                                                                                                                |
| isirv annual general meeting (AGM)                                                                                                                                                                                                                                                                                                                                                                                                                                                                                                                                                                                                                                                                                                                                                                                                                                                                                                                                                                                                                                                                                                                                                                                                                                                                                                                                                                       | <b>Concurrent afternoon workshops</b><br><br><b>5A: Animal-Human Interface</b><br><b>5B: Vaccines II</b><br><b>5C: Diagnostics</b><br><br>Afternoon networking and refreshment<br><b>Concurrent evening workshops</b><br><br><b>6A: Animal Influenza and Models</b><br><b>6B: Surveillance I</b><br><b>6C: Clinical Management</b><br><b>Poster Reception</b><br><i>Walkabout session #2 (Options VIII exhibition hall 2)</i>                                                                                                                                                                                                                                                                                                                                                                                                                                                    | <b>Concurrent afternoon workshops</b><br><br><b>7A: Late Breaking Abstracts</b><br><b>7B: Surveillance II</b><br><b>7C: Novel Therapeutics</b><br><br>Afternoon networking and refreshment<br><b>Closing plenary session Public Health</b><br><br><b>Usefulness of modeling for decision making on influenza</b><br><i>Guy Walker Department of Health, London, United Kingdom</i><br><b>Non-pharmaceutical interventions-effectiveness and consequences</b><br><i>Benjamin Cowling, University of Hong Kong, Hong Kong, SAR, China</i><br><b>Update on global vaccine policy</b><br><i>Marie-Paule Kieny, World Health Organization, Geneva, Switzerland</i>                                                                                  |

# Badge Policies

## Full Conference Badge

A Full Conference badge permits access to all the cross-cutting keynote lectures, plenary sessions, scientific breakout sessions, and the exhibit hall. Delegates with a Full Conference badge will receive a conference bag, conference program, and abstract USB. A Full Conference badge does not guarantee a seat in the breakout sessions. Breakout rooms are assigned in advance of the conference. The safety of Options VIII delegates is always a primary concern, and may require closing a room if attendance exceeds the room capacity. We encourage early arrival to the sessions to help ensure that a seat is available.

## One-Day Pass

The One-Day Pass conference badge is valid for one (1) day only. A One-Day Pass conference badge permits access to all the cross-cutting keynote lectures, plenary sessions, scientific breakout sessions, and the exhibit hall functions for 1 day. Delegates with a One-Day Pass conference badge will receive a conference bag and a conference program, but will not receive an abstract USB. A One-Day Pass conference badge does not guarantee a seat in the breakout sessions. Breakout rooms are assigned in advance of the conference. The safety of the Options VIII delegates is always a primary concern, and may require closing a room if attendance exceeds the room capacity. We encourage early arrival to the sessions to help ensure that a seat is available.

## Accompanying Guest Badge

Delegates with an Accompanying Guest badge are eligible to attend all social events that take place in the exhibits hall (coffee breaks, welcome reception and poster sessions). Accompanying guests will not be permitted to attend the cross-cutting keynote lectures, plenary sessions, or any of the scientific breakout sessions. Delegates with an Accompanying Guest badge will not receive a conference bag, conference program, or abstract USB.

## Student Badge

Student Badges may be requested by an undergraduate or graduate student. Student Badges permit access to the cross-cutting keynote lectures, plenary sessions, and the exhibit hall. Delegates with a Student Badge will receive a conference bag, conference program, and abstract book.

## Press Badge

The Options for the Control of Influenza VIII conference would like to welcome the press to Cape Town! Press Badges will permit members of the press access to all of the cross-cutting keynote lectures, plenary sessions, and the exhibit hall. Press Badges will not allow access to the scientific breakout sessions. Delegates with a Press Badge will receive a conference bag and conference program, but will not receive an abstract USB.

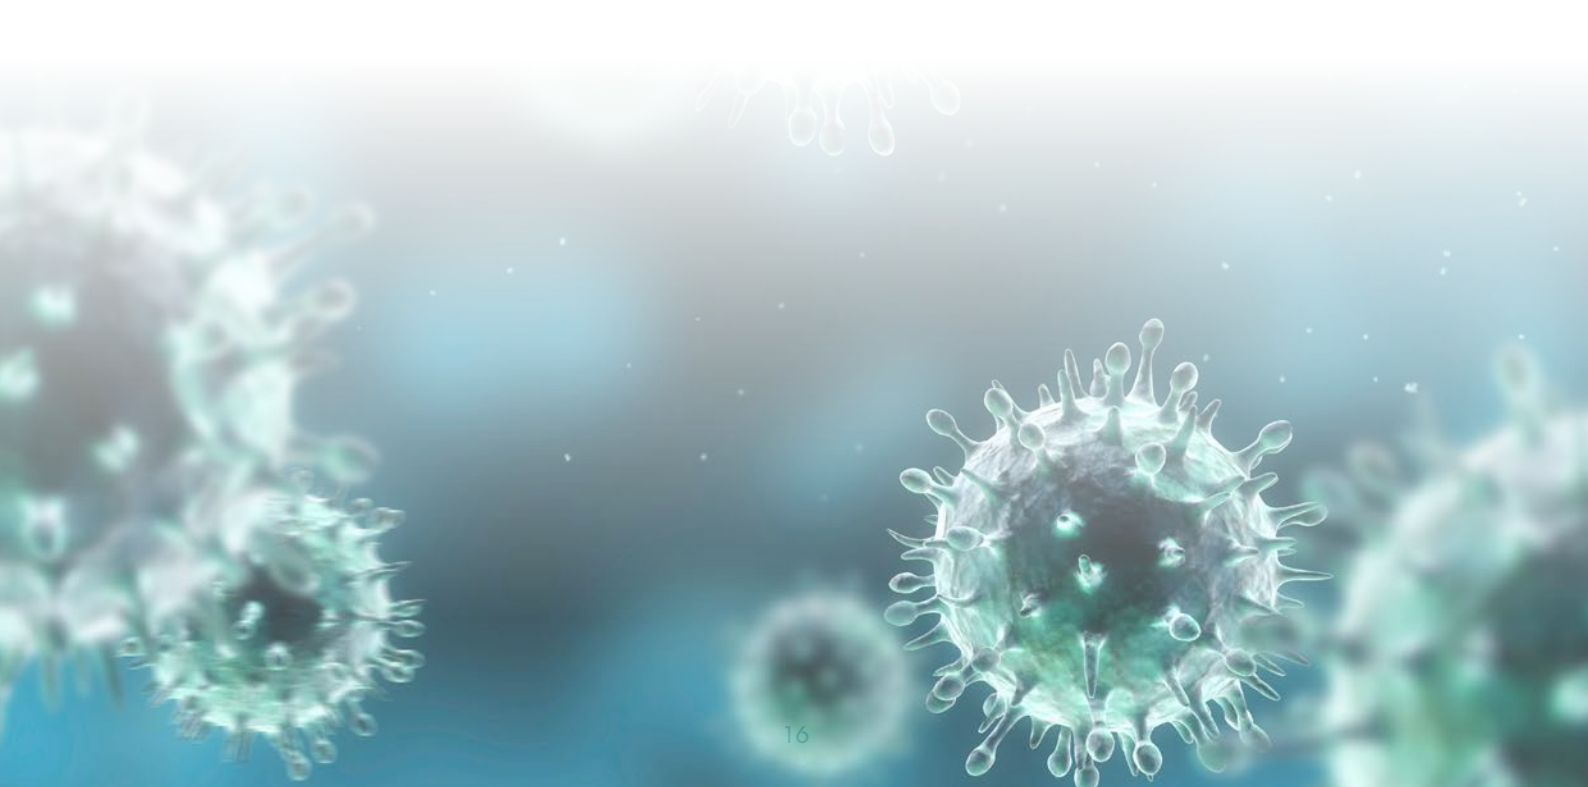

# Scientific Abstract Poster Presentations

We are pleased to highlight over 700 abstract presentations at the *Options VIII* conference. Accepted posters are on display at the Cape Town International Convention Centre in the Exhibition Hall 2, Level Zero. Delegates are invited to review and study posters throughout the day and especially during the allotted poster receptions. Due to the number of abstracts received, posters will be divided into 2 groups, with each group displayed for a 2-day period. Please see the group information below regarding dates, times, and categories.

## Group I

|                   |                        |               |
|-------------------|------------------------|---------------|
| Poster mounting:  | Wednesday, 4 September | 09.00 – 14.00 |
|                   | Thursday, 5 September  | 09.00 – 11.00 |
| Display dates:    | Thursday, 5 September  | 17.30 – 19.30 |
|                   | Friday, 6 September    | 09.00 – 18.30 |
| Poster reception: | Friday, 6 September    | 18.30 – 21.00 |
| Poster removal:   | Saturday, 7 September  | 11.30 – 13.30 |

## Poster Categories

|                 |                                                        |
|-----------------|--------------------------------------------------------|
| P1-100 – P1-118 | News and Views from H7N9 Outbreak                      |
| P1-119 – P1-154 | Epidemiology I                                         |
| P1-155 – P1-166 | Policy and Risk Communication                          |
| P1-167 – P1-184 | Virology and Viral Receptors                           |
| P1-185 – P1-208 | Models Informing Public Health and Pandemic Mitigation |
| P1-209 – P1-253 | Evolution, Systems Biology, and Pathogenesis           |
| P1-254 – P1-292 | Antiviral Drugs and Resistance                         |
| P1-293 – P1-336 | Disease Burden and Health Economics                    |
| P1-337 – P1-366 | Innate and Adaptive Immunity                           |
| P1-367 – P1-414 | Vaccines I                                             |
| P1-415 – P1-434 | Transmission and Infection Control                     |

## Group II

|                   |                       |               |
|-------------------|-----------------------|---------------|
| Poster mounting:  | Saturday, 7 September | 14.00 – 17.00 |
| Display dates:    | Sunday, 8 September   | 09.00 – 17.30 |
|                   | Monday, 9 September   | 09.00 – 17.30 |
| Poster reception: | Sunday, 8 September   | 17.30 – 21.00 |
| Poster removal:   | Tuesday, 10 September | 10.00 – 12.00 |

## Poster Categories

|                         |                             |
|-------------------------|-----------------------------|
| P2-435 – P2-465         | Epidemiology II             |
| P2-466 – P2-497         | Animal Human Interface      |
| P2-498 – P2-549         | Vaccines II                 |
| P2-550 – P2-570         | Diagnostics                 |
| P2-571 – P2-603         | Animal Influenza and Models |
| P2-604 – P2-615         | Clinical Management         |
| P2-616 – P2-694         | Surveillance                |
| P2-695 – P2-714         | Novel Therapeutics          |
| LBA-P2-007 – LBA-P2-075 | Late-Breaking Abstracts     |

We thank you for your adherence to this schedule in order to ensure that everyone's poster board is available for poster presentation. Posters not removed per this schedule will be removed by organizers and discarded.

## NEW Walkabout Sessions

The *Options VIII* Scientific Chairs are pleased to highlight scientific excellence through Poster Walkabout Sessions during the poster receptions. Selected abstracts will be presented to the audience from the poster presentation area. Delegates are invited to join the tour of selected posters and discuss topics of interest. This is an opportunity to meet the leaders in the field of influenza who will facilitate the walkabouts.

SATELLITE SYMPOSIUM

# Four Questions about Influenza Immunization

OPTIONS VIII CONFERENCE  
CAPE TOWN - SOUTH AFRICA

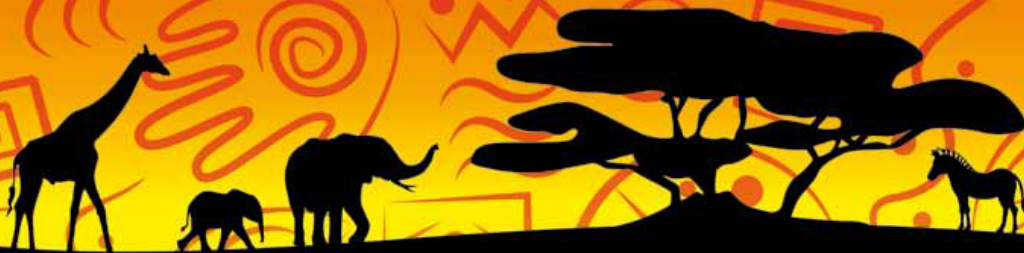

Friday, September 6, 2013 - 1:00pm to 3:00pm

*Lunch boxes will be served*

CHAIR  
CO-CHAIR

THOMAS D. SZUCS  
FREDERICK R. VOGEL

🕒 How does influenza vaccination benefit the public health?

**David S. Fedson, MD**

Sergy Haut, France

👁️ What are key drivers that could improve influenza vaccination coverage rates in the general population?

**Thomas D. Szucs, MD, MPH, LL.M.**

Institute of Social and Preventive Medicine, University of Zurich - Switzerland

📋 What are the roles and responsibilities of healthcare workers in influenza prevention?

**George Kassianos, MD (Hons), FRCGP, FESC, DRCOG, LRCP (Edin.), LRCS (Edin.), LRCP&S (Glasgow), DMedAcup., DMedHypn., DFP, FFM RCPS (Glasgow)**

Ringmead Medical Practice, Bracknell, Berkshire, England

🕒 How can we improve influenza vaccines?

**Vanessa Escuret-Poncin, PD, PhD**

Virology Department, National Influenza Reference Centre, Lyon, France

# Cape Town International Convention Center Map

## EXHIBITION

Exhibition Hall 2  
Posters  
Welcome Reception  
Exhibits  
Refreshment Breaks

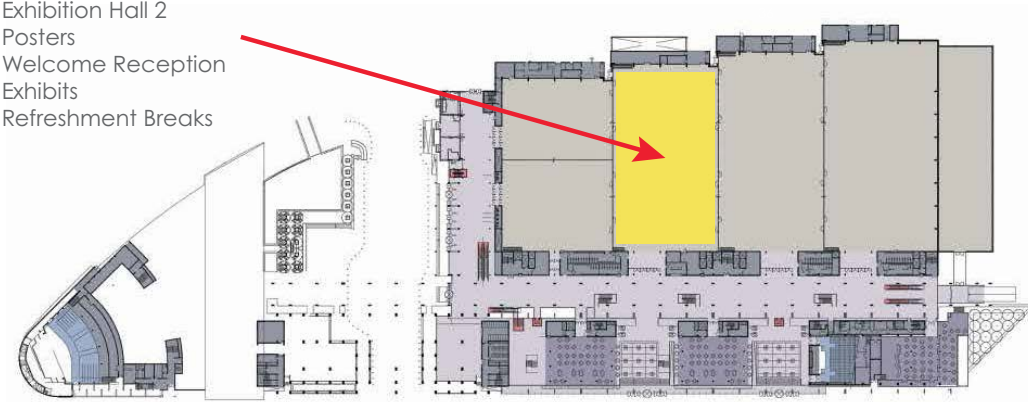

**LEVEL 0**

## KEYNOTE AND PLENARY SESSIONS AND WORKSHOP A

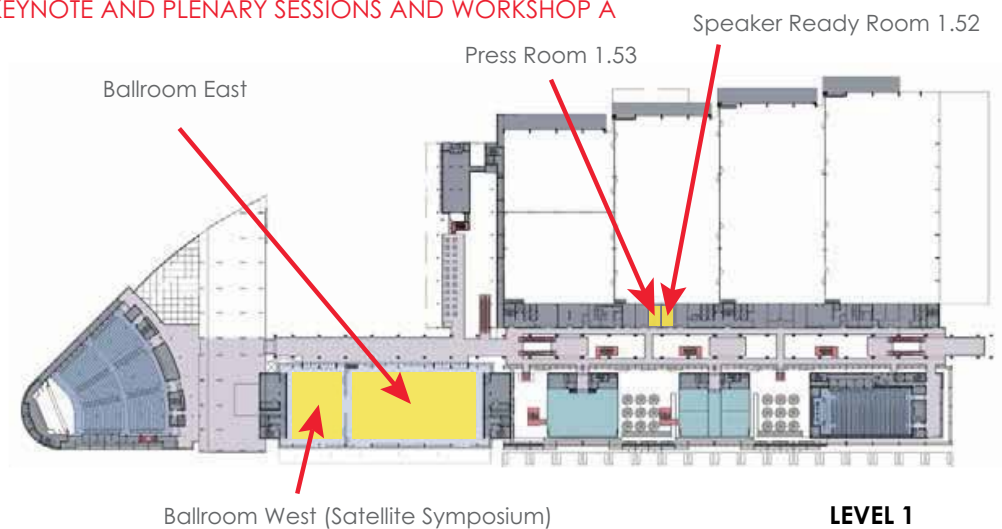

**LEVEL 1**

## WORKSHOPS B AND C

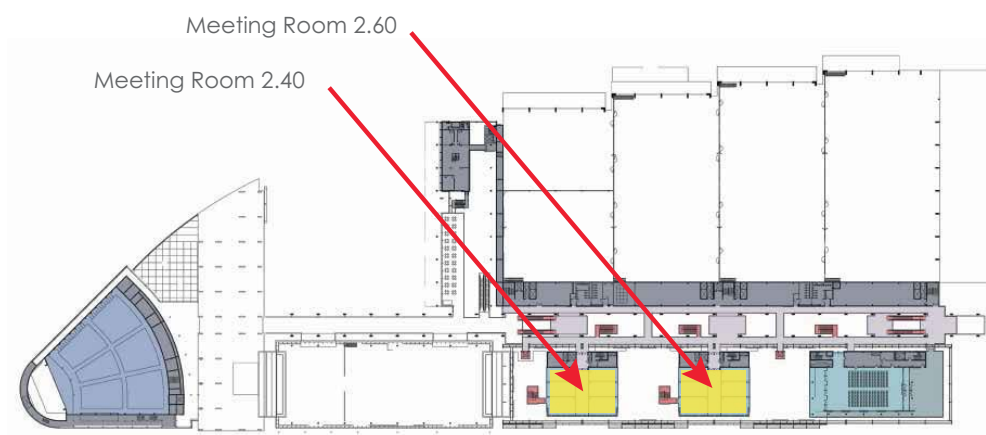

**LEVEL 2**

# Agenda

Wednesday, 4 September 2013

08.00-18.00

Registration  
Exhibition Hall 2 Foyer (Level Zero)

Thursday, 5 September 2013

09.00-09.40

## Opening Ceremony

Ballroom East (Level One)

Welcome From Congress and isirv Chair

Welcome From Cape Town Minister of Health  
*The Honorable Aaron Motsoaledi, Minister of Health-South Africa, Cape Town, South Africa*

My search for Pandemic Influenza  
*Robert Webster, St. Jude Children's Research Hospital, Memphis, Tennessee, United States of America*

09.40-11.00

## Morning Plenary Session 1—Virology

Ballroom East (Level One)

Chair:

Wendy Barclay, Imperial College London, London, United Kingdom

vRNP Structure and How Does the Polymerase Work  
*Yoshihiro Kawaoka, University of Wisconsin Madison, School of Veterinary Medicine, Madison, Wisconsin, United States of America*

PA-x and PB1-N40  
*Paul Digard, The Roslin Institute, University of Edinburgh, Scotland*

Importins and Their Role in Host Restriction of Avian Influenza viruses  
*Gülsah Gabriel, Heinrich-Pette-Institute, Leibniz Institute for Experimental Virology, Hamburg, Germany*

11.00-11.30

Morning Networking and Refreshment  
Exhibition Hall 2 (Level Zero)

11.30-13.00

## Mid-Day Plenary Session 1—Pathogenesis

Ballroom East (Level One)

Chair:

Stacey Schultz-Cherry, St. Jude Children's Research Hospital, Memphis, Tennessee, United States of America

Lung Injury/ARDS  
*Malik Peiris, Department of Microbiology and HKU-Pasteur Research Centre, The University of Hong Kong, Hong Kong SAR, China*

Overview on Pathogenesis and Transmission of Swine Influenza  
*Juergen Richt, Kansas State University, College of Veterinary Medicine, Manhattan, Kansas, United States of America*

Experimental Studies of Influenza Virus Transmission in Humans  
Jonathan Van Tam, Health Protection and Influenza Research Group,  
Epidemiology and Public Health, University of Nottingham,  
Nottingham, United Kingdom

13.00-14.00

Lunch—on own

14.00-15.30

## Concurrent Afternoon Workshops—A

Workshop 1A: News and Views From the H7N9 Outbreak  
Ballroom East (Level One)

Chairs:

Yi Guan, University of Hong Kong, State Key Laboratory of Emerging Infectious Diseases, Hong Kong SAR, China  
Debby van Riel, Erasmus University Medical Centre, Rotterdam, The Netherlands

State-of-the-Art Presentation:

**H7N9 Outbreak**

Yi Guan, University of Hong Kong, State Key Laboratory of Emerging Infectious Diseases, Hong Kong SAR, China

Oral Presentations:

- O-800 Comparative epidemiology of human infections with avian influenza A(H7N9) and A(H5N1) viruses in China. Benjamin Cowling
- O-801 Mammalian adaptation markers in avian-origin H7N9 virus, a comprehensive investigation in isolates and clinical specimens from the H7N9 influenza affected area. Honglin Chen
- O-802 Pathogenesis and transmission of H7N9 influenza virus in poultry. Mary Pantin-Jackwood
- O-803 Lessons learned from the first case of H7N9 in Taiwan and public health implication from integrated surveillance from animals to humans. Chwan-Chuen King

Workshop 1B: Epidemiology I  
Meeting Room 2.40 (Level Two)

Chairs:

Aubree Gordon, School of Public Health, University of California, Berkley, California, United States of America  
Ghazi Kayali, St. Jude Children's Research Hospital, Memphis, Tennessee, United States of America

Oral Presentations:

- O-804 The role of HIV in the household introduction and transmission of influenza in an urban setting, Nairobi, Kenya, 2008-2011. Gideon Emukule
- O-805 Risk factors for severe acute respiratory infection (SARI) and influenza hospitalisation in New Zealand. Michael Baker
- O-806 Pandemic H1N1 virus transmission and shedding dynamics in houses of index cases detected by active surveillance: the Ha Nam cohort. Annette Fox
- O-807 Severe influenza-associated lower respiratory tract infection in a high HIV-prevalence setting-South Africa, 2009-2011. Sibongile Walaza

- O-808 Variation in burden of influenza-associated hospitalization between two rural communities in India: results of a population-based study, 2010-2012. Shobha Broor
- O-809 Environmental correlates of H5N2 low pathogenicity avian influenza (LPAI) outbreak heterogeneity in domestic poultry in Italy, 2010-2012. Lapo Mughini-Gras

### Workshop 1C: Policy and Risk Communication Meeting Room 2.60 (Level Two)

**Chairs:** Michael Osterholm, Center for Infectious Disease Research and Policy, University of Minnesota, Minneapolis, Minnesota, United States of America  
Doudou Diop, Institut de Recherche pour le Développement, Dakar, Senegal

#### Oral Presentations:

- O-810 Influenza vaccines and influenza antiviral drugs in Africa: are they available and do guidelines for their use exist? Adam Cohen
- O-811 Rapid knowledge translation during the 2009 influenza pandemic Joel Kettner
- O-812 Communicating influenza antivirals' stockpiling strategies across Europe: a quantitative and qualitative study. Frederic Boudier
- O-813 Where backyard poultry producers seek help for sick poultry: implications for avian influenza prevention in Bangladesh. Nadia Rimi
- O-814 The World Health Organization battle against respiratory viruses (BRaVe) initiative: bridge science and policy to foster innovative therapies to tackle respiratory viral infections. Nahoko Shindo
- O-815 Herald 1918 pandemic waves: importance for contemporary pandemic response strategies. Wladimir Alonso

15.30-16.00 Afternoon Networking and Refreshment  
Exhibition Hall 2 (Level Zero)

### 16.00-17.30 Concurrent Evening Workshops—B

#### Workshop 2A: Virology and Viral Receptors Ballroom West (Level One)

**Chairs:** Leo Poon, Centre of Influenza Research and School of Public Health, the University of Hong Kong, Hong Kong SAR, China  
Husni Elbahesh, St. Jude Children's Research Hospital, Memphis, Tennessee, United States of America

#### Oral Presentations:

- O-816 Focal adhesion kinase (FAK) regulates efficient influenza A virus entry and RNA replication. Husni Elbahesh
- O-817 Airborne transmission in ferrets is associated with a change in glycan receptor specificity of an a 2, 3 sialic acid-specific 2009 pandemic influenza A virus. Kanta Subbarao
- O-818 The cell-surface mucin MUC1 is a potential receptor for influenza A virus infection. Julie McAuley

- O-819 Properties and prevalence of neuraminidases of human H3N2 influenza viruses that bind sialic acid via their catalytic site. Steve Wharton
- O-820 Host-specific differences in membrane fusion activity of H1N1 influenza A viruses. Jan Baumann
- O-821 A statistical strategy to identify recombinant viral ribonucleoprotein of avian, human, and swine influenza A viruses with elevated polymerase activity. Leo Poon

**Workshop 2B: Epidemiology II**  
Meeting Room 2.40 (Level Two)

**Chairs:** Ben Cowling, School of Public Health, Li Ka Shing Faculty of Medicine, the University of Hong Kong, Hong Kong SAR, China  
Saranya Sridhar, National Heart and Lung Institute, Imperial College London, Norfolk Place, London, United Kingdom

**Oral Presentations:**

- O-822 The dynamics of pandemic and seasonal influenza viral shedding and clinical illness in naturally acquired infections. Benjamin Cowling
- O-823 Divergent patterns of circulating influenza viruses in two regions of Northern India: when does equator not define hemisphere? Parvaiz Koul
- O-824 Higher incidence of pandemic influenza natural infection in the third wave compared with the second wave in an adult community cohort in the UK. Saranya Sridhar
- O-825 Comparative incidence and severity of infection with currently endemic human influenza A viruses: a longitudinal study. Steven Riley
- O-826 Evolution of an influenza pandemic in 13 countries on 5 continents monitored by protein microarray from neonatal screening bloodspots. Adam Meijer
- O-827 Influenza seasonality in Madagascar: the mysterious African free-runner. Wladimir Alonso

**Workshop 2C: Models Informing Public Health and Pandemic Mitigation**  
Meeting Room 2.60 (Level Two)

**Chairs:** John Watson, Health Protection Agency, London, United Kingdom  
Amber Smith, St. Jude Children's Research Hospital, Memphis, Tennessee, United States of America

**Oral Presentations:**

- O-828 Pandemic influenza mortality in developing countries is dramatically reduced by targeting interventions to those with endemic diseases. George Milne
- O-829 The social resolution of influenza transmission in a human population. Adam Kucharski
- O-830 Origins of the basic reproduction number,  $R_0$ , and its value in influenza research. John Watkins
- O-831 The first few hundred—case and contact series investigations—experiences from the United Kingdom. Nicki Boddington

- O-832 Immunogenicity, effectiveness, and population impact of influenza vaccine in England during seasonal and pandemic periods.  
Andrew Hayward
- O-833 Influenza A Virus co-infection kinetics: gaining insight into pathogenesis through mathematical models. Amber Smith

17.30-19.30

Welcome Reception  
Exhibition Hall 2 (Level Zero)

Sponsored by Wesgro/Cape Town and Western Cape Convention Bureau  
Please join us in the exhibition hall for a traditional Cape Town Minstrel Parade. Singers, dancers, and musicians dressed in traditional costumes will open the exhibition hall in true Cape Town fashion. Face painting, crafts vendors, and a cappella choirs will create a multifaceted welcome celebration that will not be soon forgotten.

Friday, 6 September 2013

09.00-09.40

Cross-Cutting Keynote  
Ballroom East (Level Zero)

The Interaction Between Influenza and Lung Co-Pathogens  
*Keith Klugman, Gates Foundation, Seattle, Washington, United States of America*

09.40-11.00

**Morning Plenary Session 2—Epidemiology**  
Ballroom East (Level Zero)

Chair:

Gavin Smith, Program of Emerging Infectious Diseases, Duke-NUS Graduate Medical School, Singapore

Maternal Influenza Immunization  
*Saad Omer, Emory University, Schools of Public Health and Medicine, Atlanta, Georgia, United States of America*

Epidemiology of Influenza in Africa  
*Cheryl Cohen, NICD, Cape Town, South Africa*

Challenges to Estimating Influenza Mortality/Severity  
*Anthony Mounts, Global Influenza Programme, Health Security and Environment Cluster, World Health Organization, Geneva, Switzerland*

11.00-11.30

Morning networking and refreshment  
Exhibition Hall 2 (Level Zero)

11.30-13.00

**Mid-Day Plenary Session 2—Immunology**  
Ballroom East (Level One)

Chair:

Jackie Katz, National Center for Immunization and Respiratory Disease Centers for Disease Control and Prevention, Atlanta, Georgia, United States of America

Mx Restriction of Influenza Viruses  
*Otto Haller, University Hospital Freiburg, Freiburg, Germany*

### T Cells in the Respiratory Tract

Thomas Braciale, University of Virginia, Charlottesville, Virginia,  
United States of America

### B Cells and Influenza

Paul G. Thomas, St. Jude Children's Research Hospital, Memphis,  
Tennessee, United States of America

13.00-15.00

Sanofi Symposium: Four Questions About Influenza Immunization  
Ballroom West (Level One)  
Box lunch served

13.00-15.00

Lunch—on own

15.00-16.30

## Concurrent Afternoon Workshops—C

### Workshop 3A: Evolution, Systems Biology, and Genomics

Ballroom East (Level One)

#### Chairs:

Gillian Air, University of Oklahoma Health Sciences Center, Department  
of Biochemistry and Molecular Biology, Oklahoma City, Oklahoma,  
United States of America,  
Erik Karlsson, St. Jude Children's Research Hospital,  
Memphis, Tennessee, United States of America

#### Oral Presentations:

- O-834 Selection on hemagglutinin imposes a genetic bottleneck during  
mammalian transmission of H5N1 influenza viruses. Thomas Friedrich
- O-835 A systems biology approach reveals novel host response genes that  
differentially regulate influenza virus pathogenicity. Amie Eisfeld
- O-836 The importin- $\alpha 7$  gene is a determinant of influenza virus cell tropism in  
the murine lung. Patricia Resa Infante
- O-837 Antigenic and receptor-binding properties of recent human H3N2  
viruses. Gillian Air
- O-838 The obese host as a driver of influenza virus evolution. Erik Karlsson
- O-839 Increased expression of  $\beta 6$  integrin is associated with enhanced  
inflammation and lung damage during influenza infection.  
Victoria Meliopoulos

### Workshop 3B: Antiviral Drugs and Resistance

Meeting Room 2.40 (Level Two)

#### Chairs:

Elena Govorkova, St. Jude Children's Research Hospital, Memphis,  
Tennessee, United States of America  
Hui-Ling Yen, Li Ka Shing Faculty of Medicine, School of Public Health,  
University of Hong Kong, Hong Kong SAR, China

#### Oral Presentations:

- O-840 Mechanism-based covalent inhibitors of influenza virus neuraminidases  
demonstrate broad spectrum antiviral efficacy in vitro and in vivo.  
Jennifer McKimm-Breschkin

- O-841 A novel I221L substitution in neuraminidase confers high level resistance to oseltamivir in clinical influenza B virus isolates. Bruno Lina
- O-842 Characterization of the R292K neuraminidase mutation that confers resistance to the neuraminidase inhibitors in a novel H7N9 human isolate. Hui-Ling Yen
- O-843 Neuraminidase inhibitor oseltamivir protects mice against lethal A/Anhui/1/2013 (H7N9) influenza virus infection. Elena Govorkova
- O-844 The compensatory role of non-neuraminidase mutations in replication or transmission of oseltamivir-resistant influenza virus. Angie Lackenby
- O-845 Drug susceptibility of zoonotic influenza viruses associated with outbreaks in humans: 2011-2013. Larisa Gubareva

### Workshop 3C: Disease Burden and Health Economics Meeting Room 2.60 (Level Two)

**Chairs:** Neil Cameron, Stellenbosch University, Stellenbosch, South Africa  
Ellen Fragaszy, University College London, London, United Kingdom

#### Oral Presentations:

- O-846 Routine PCR testing of respiratory samples from coronial autopsies increases the recognition of influenza and other respiratory viruses as causes of death. David Smith
- O-847 The burden of influenza and RSV among inpatients and outpatients in rural western Kenya, 2009-2012. Gideon Emukule
- O-848 Mortality associated with influenza and respiratory syncytial virus among children less than 5 years of age in a high HIV-prevalence setting—South Africa, 1998-2009. Stefano Tempia
- O-849 Monitoring mortality for public health action in Europe, EuroMOMO: an important tool for influenza surveillance and impact assessment. Anne Mazick
- O-850 Case fatality risk in the UK during the first two waves of the 2009 H1N1 pandemic—results from the Flu Watch Study. Ellen Fragaszy
- O-851 Increased risk of swine influenza in pig industry workers compared with the general population in the UK. Andrew Hayward

16.30-17.00 **Afternoon Networking and Refreshment**  
Exhibition Hall 2 (Level Zero)

### 17.00-18.30 **Concurrent Evening Workshops—D**

#### Workshop 4A: Innate and Adaptive Immunity Ballroom West (Level One)

**Chairs:** Anne Kelso, WHO Collaborating Centre for Reference and Research on Influenza, Victoria, Australia,  
Carolien van de Sandt, Erasmus MC, Department of Viroscience, Rotterdam, The Netherlands

# Oral Presentations:

- O-852 A potent cytotoxic T-cell epitope in the extracellular domain of influenza B virus NB promotes virus clearance. Xavier Saelens
- O-853 Human cytotoxic T-lymphocytes directed to seasonal influenza A viruses cross-react with the newly emerging H7N9 virus. Carolien van de Sandt
- O-854 Induction of broadly neutralizing influenza virus group 2 HA antibodies through natural infection and novel vaccination strategies. Irina Margine
- O-855 Type I interferon antagonistic properties of IAV polymerase proteins determine pathogenicity. Swantje Liedmann
- O-856 Protection against influenza infection was associated with neutralizing antibodies detected in the absence of HI antibodies for pandemic H1N1 but not for H3N2 in a natural infection cohort. Hoa Le
- O-857 Inhibition of cellular p38 MAP kinase impairs influenza virus induced primary and secondary host gene responses thereby protecting mice from lethal H5N1 infection. Stephan Ludwig

## Workshop 4B: Vaccines I Meeting Room 2.40 (Level Two)

Chair: Peter Palese, Mount Sinai School of Medicine, New York, New York, United States of America,  
Kristin G-I Mohn, University of Bergen, Bergen, Norway

# Oral Presentations:

- O-858 Effectiveness of seasonal trivalent influenza vaccine for preventing influenza virus illness among pregnant women: a population-based case-control study during the 2010-2011 and 2011-2012 influenza seasons. Mark Thompson
- O-859 Pandemic live attenuated influenza vaccines prime for a long lasting immune response. Catherine Luke
- O-860 Effectiveness of seasonal influenza vaccination of children in tropical developing Africa: a cluster-randomized trial. John Victor
- O-861 Trivalent inactivated influenza vaccine immunogenicity in HIV-infected pregnant women and transplacental antibody transfer. Marta Nunes
- O-862 A study of the local and systemic immune responses after intranasal influenza vaccination in children. Kristin G-I Mohn
- O-863 Effectiveness of 2011/12 seasonal influenza vaccines in the prevention of influenza-related hospitalization in Canadian adults: a Public Health Agency of Canada/Canadian Institutes of Health Research (PCIRN) Serious Outcomes Surveillance Network study. Shelly McNeil

## Workshop 4C: Transmission and Infection Control Meeting Room 2.60 (Level Two)

Chairs: Randy Albrecht, Icahn School of Medicine at Mount Sinai, Department of Microbiology, New York, New York, United States of America  
Sun-Woo Yoon, St. Jude Children's Research Hospital, Memphis, Tennessee, United States of America

## Oral Presentations:

- O-864 Biosafety and biosecurity in a biocontainment laboratory working with highly pathogenic avian influenza (HPAI). Lisa Kercher
- O-865 Utilizing endogenous microRNA to confer molecular biocontainment to gain-of-function influenza viruses: towards risk mitigation. Randy Albrecht
- O-866 Limited airborne transmission of influenza A/H7N9 virus between ferrets. Eefje Schrauwen
- O-867 Transmission bottlenecks in the ferret model differ between respiratory droplet and contact transmission routes. Wendy Barclay
- O-868 Efficacy of surgical face masks in reducing influenza virus dissemination in human exhaled breath. Nancy Leung
- O-869 Household transmission of influenza in Nicaragua. Aubree Gordon

18.30-21.00

**Poster Reception—Group I**

Exhibition Hall 2 (Level Zero)

## Walkabout Poster Session I

Starting at poster P1-115

18.30-19.15

**Virology**

## Host:

Paul Digard, The Roslin Institute, University of Edinburgh, Scotland

## Posters:

- P1-115 Novel avian-origin influenza A (H7N9) virus attaches to epithelium in both upper and lower respiratory tract of humans. Debby van Riel
- P1-176 Hemagglutinin receptor specificity and structural analyses of aerosol transmissible H5N1 viruses. Robert De Vries
- P1-182 Solving the complexities of influenza A virus infection of macrophages: macrophage galactose-type lectin (MGL) can mediate virus attachment and entry. Sarah Londrigan
- P1-252 Genetic analysis of low pathogenic avian influenza H4N6 and H9N2 viruses circulating in West Bengal, India reveals genetic diversity. Jayati Mullick
- P1-253 Generation and characterization of influenza A viruses with altered mutational frequencies. Peter Cheung
- P1-290 Resistance mutation R292K in A(H6N2) is induced by low levels of oseltamivir exposure of infected mallards. Anna Gillman
- P1-291 Recent A(H1N1)pdm09 influenza viruses encode permissive NA mutations which improve the fitness of oseltamivir-resistant H275Y variants. Aeron Hurt
- P1-350 The role of antigen presenting cells induced by influenza and pneumococcal coinfections: an in vitro model. Jonathan Hoffmann
- P1-432 Role of a hemagglutinin residue in the emergence of the 2009 H1N1 pandemic influenza virus. Sun-Woo Yoon

19.15-20.00

## Epidemiology

Host: Keith Klugman, Gates Foundation, Seattle, Washington, United States of America

Posters:

- P1-116 Mild to moderate influenza A(H7N9) infections detected through China's National Influenza-Like-Illness Sentinel Surveillance System. Dennis Ip
- P1-152 Influenza-associated severe acute respiratory illness deaths in the WHO African Region: a case-series from 8 countries. Meredith McMorrow
- P1-153 Development of an on-line, real-time information retrieval system for influenza surveillance data collection and sharing in Mongolia. Pagbajab Nymadawa
- P1-207 Anydemic, a new kind of real-time stochastic model for decision-making: feasibility study. Jean Marie Cohen
- P1-208 Assessing outbreak containment success in case of accidental laboratory escape of potential pandemic pathogens. Marco Ajelli
- P1-334 Burden of outpatient visits due to influenza infection and cases averted by vaccination—United States, 2011/12 influenza season. Mike Jackson
- P1-335 Excess mortality associated with influenza among tuberculosis deaths in South Africa, 1999-2009. Sibongile Walaza
- P1-433 Investigation of a nosocomial influenza A(H3N2) outbreak among geriatric patients and health care workers. Bruno Lina

20.00-20.45

## Vaccines

Host: Veronika von Messling, INRS-Institut Armand-Frappier, Laval, Quebec, Canada, and Paul Ehrlich Institute, Langen, Germany

Posters:

- P1-163 Influenza awareness and vaccine advocacy in the Asia-Pacific region: the role of the Asia-Pacific Alliance for the Control of Influenza (APACI). Lance Jennings
- P1-164 Informing future policy for influenza vaccination programs in sub-Saharan Africa: forging a path for decision-making. Doudou Diop
- P1-364 Antibody landscapes: quantifying the antibody response to vaccination and infection. Judith Fonville
- P1-413 Characteristics of vaccine failures in a randomized placebo-controlled trial of inactivated influenza vaccine in children. Benjamin Cowling
- P1-414 Seasonal influenza vaccine uptake in Kenya in 2012: does father involvement make a difference? Nancy Otieno

Saturday, 7 September 2013

08.00-11.30

Feature Cornerstone Session: Animal-Human Interface  
Ballroom East (Level One)

Chair:

Malik Peiris, Centre of Influenza Research, School of Public Health,  
University of Hong Kong, Hong Kong SAR, China

Mammalian Adaptation of Influenza Viruses: What We Know and  
What We Don't

*Terrence Tumpey, Immunology and Pathogenesis Branch, Influenza  
Division, Centers for Disease Control and Prevention, Atlanta, Georgia,  
United States of America*

Ecology, Evolution, and Human Health Risks From Emerging  
Swine Influenza Viruses

*Richard Webby, Infectious Diseases, St. Jude Children's Research  
Hospital, Memphis, Tennessee, United States of America*

Risk Assessing Animal Viruses for Pandemic Threat

*Nancy Cox, WHO Collaborating Center for Surveillance Epidemiology  
and Control of Influenza, National Center for Immunization and  
Respiratory Diseases, Coordinating Center for Infectious Disease,  
Influenza Division, Centers for Disease Control and Prevention, Atlanta,  
Georgia, United States of America*

Human Disease Caused by Avian Influenza A/H7N9 and  
A/H5N1 Virus Infections

*Peter Horby, Oxford University Clinical Research Unit -  
Wellcome Trust Major Overseas Programme, Hanoi, Vietnam, and  
Singapore Infectious Diseases Initiative, Singapore*

The Pros and Cons of Influenza Gain of Function Studies

Panelists include:

- *Yoshihiro Kawaoka, University of Wisconsin Madison,  
School of Veterinary Medicine, Madison, Wisconsin,  
United States of America*
- *Charles Russell, St. Jude Children's Research Hospital, Memphis,  
Tennessee, United States of America*
- *Adolfo Garcia-Sastre, Mount Sinai School of Medicine, New York,  
New York, United States of America*
- *Michael Osterholm, Center for Infectious Disease Research and  
Policy, University of Minnesota, Minneapolis, Minnesota,  
United States of America*
- *Marc Lipsitch, Harvard University, Cambridge, Massachusetts,  
United States of America*
- *Jesse Bloom, Fred Hutchinson Cancer Research Center, Seattle,  
Washington, United States of America*

11.30-12.00

Scholarship Awards Ceremony

12.00-13.00

isriv Annual General Meeting (AGM)

Saturday

13.00-19.00

### Free Afternoon—Discover Cape Town and Western Cape

Discover this dazzling city, sip world-class wines as you explore the world-renowned winelands, or take a scenic tour down the coast to the meeting point of 2 oceans. *Options* delegates are free to explore this wonderful area. A selection of tour options have been arranged with special prices negotiated for the delegates. These tours are at the discretion of the delegate and fees apply, so grab some colleagues and schedule your tour early.

Sunday, 8 September 2013

09.00-9.40

Cross-Cutting Keynote:  
Ballroom East (Level One)

Universal Epitopes, Their Application to Vaccines and Therapy, and Importance in Influenza Epidemiology

*Peter Palese, Icahn School of Medicine at Mount Sinai, New York, New York, United States of America*

09.40-11.00

## Morning Plenary Session 3—Diagnostics

Ballroom East (Level One)

Chair:

Wolfgang Preiser, Stellenbosch University and National Health Laboratory Service, Stellenbosch, South Africa

Real-Time PCR

*Stephen Lindstrom, National Center for Immunization for Respiratory Diseases, Centers for Disease Control and Prevention, Atlanta, Georgia, United States of America*

Influenza Whole Genome Analysis and Its Role in Diagnostics, Patient Care, and Public Health

*Monica Galiano, Health Protection Agency, London, United Kingdom*

Clinical Relevance of Influenza Viral Load Measurement

*Nelson Lee, Stanley Ho Center for Emerging Infectious Diseases, The Chinese University of Hong Kong, Hong Kong SAR, China*

11.00-11.30

Morning Networking and Refreshment  
Exhibition Hall 2 (Level Zero)

11.30-13.00

## Mid-Day Plenary Session 3—Clinical

Chair:

Marc Mendelson, Groote Schuur Hospital, University of Cape Town, Cape Town, South Africa

Brave and ISARIC: New Paradigms for Responding to Global Respiratory Threats

*Nahoko Shindo, World Health Organization, Geneva, Switzerland*

Sunday

### Influenza and Pregnancy

Shigeru Saito, *Department of Obstetrics and Gynecology, Graduate School of Medicine and Pharmaceutical Science for Research, University of Toyama, Toyama Prefecture, Japan*

### The Many Faces of Influenza

Fred Hayden, *University of Virginia School of Medicine, Charlottesville, Virginia, United States of America*

13.00-14.00

Lunch—on own

14.00-15.30

## Concurrent Afternoon Workshops—E

### Workshop 5A: Animal-Human Interface

Ballroom East (Level One)

#### Chairs:

Marietjie Venter, *National Institute for Communicable diseases, Pretoria, South Africa*

Amalya Mangiri, *US Centers for Disease Control and Prevention, Jakarta, Indonesia*

#### Oral Presentations:

- O-870 Reduction in airborne virus using modifications of simulated home slaughter of asymptomatic H5N1 HPAI virus infected chickens. David Swayne
- O-871 Surveillance for human infections with avian influenza A viruses among live bird market workers and their household members in Dhaka city area, Bangladesh. Sadia Afreen
- O-872 TRPM8 and susceptibility to highly pathogenic avian influenza H5N1. Peter Horby
- O-873 Characterization of H3N2pM-like and novel reassortant H3N1 swine viruses with pandemic H1N1 2009-like segments isolated in Korea. Philippe Noriel Pascua
- O-874 Human infections with avian influenza H7N1 and H5N2 strains during outbreaks in ostriches. Marietjie Venter
- O-875 Risk analysis of H2N2 viruses from the avian reservoir. Jeremy Jones

### Workshop 5B: Vaccines II

Meeting Room 2.40 (Level Two)

#### Chairs:

Dave Wentworth, *J. Craig Venter Institute, Rockville, Maryland, United States of America*

Florian Krammer, *Icahn School of Medicine at Mount Sinai, New York, New York, United States of America*

#### Oral Presentations

- O-876 Vaccine-induced anti-HA2 antibodies promote virus entry and enhance influenza A virus pathology. Surender Khurana
- O-877 Synthetic generation of influenza vaccine viruses for rapid response to pandemics. Pirada Suphaphiphat
- O-878 Structure and accessibility of HA trimers on intact 2009 H1N1 pandemic influenza virus to stem region-specific neutralizing antibodies. Audrey Harris

- O-879 Universal influenza vaccinia vaccine requires CD4+ T cells for heterosubtypic protection. Sophie Valkenburg
- O-880 How we can use TLR2-agonist-based adjuvants to improve protection against influenza epidemics and pandemics. Brendon Chua
- O-881 Evaluation of influenza A and B viruses isolated and passaged in the qualified MDCK suspension cell line (MDCK33016PF) and embryonated chicken eggs. Heidi Peck

#### Workshop 5C: Diagnostics Meeting Room 2.60 (Level Two)

**Chairs:** Lance Jennings, Microbiology Health Laboratories, Canterbury Health Laboratories, Christchurch, New Zealand  
Amy Krafft, National Institute of Allergy and Infectious Diseases  
Bethesda, Maryland, United States of America

#### Oral Presentations:

- O-883 Poor correlation of influenza viral load between swabs of clinical samples from the 2011-2012 influenza season in Belgium highlights the importance of standardized sample collection. Liesbeth Van Wesenbeeck
- O-884 Quantitative influenza diagnostic testing (QIDT) as a novel biomarker for the monitoring of disease activity at the point-of-care. Barbara Rath
- O-885 Do case definitions affect the prediction of influenza virus in different seasons in north India? Rahul Srivastava
- O-886 Diagnosis of influenza A/H1N1pdm virus genome by hairpin-type peptide nucleic acid chromatography. Kunihiro Kaihatsu
- O-887 Better tests, better guidance, better practice: outcomes of a strategy for improving rapid influenza diagnostic tests. Daniel Jernigan
- O-882 H5N1-SeroDetect EIA and rapid test: a novel differential diagnostic assay for serodiagnosis of H5N1 infections and surveillance. Surender Khurana

15.30-16.00 Afternoon Networking and Refreshment  
Exhibition Hall 2 (Level Zero)

#### 16.00-17.30 Concurrent Evening Workshops—F

##### Workshop 6A: Animal Influenza and Models Ballroom East (Level One)

**Chairs:** David Suarez, US Department of Agriculture, Athens, Georgia, United States of America  
Marietta Ducatez, INRA UMR, Toulouse, France

#### Oral Presentations:

- O-888 Quantifying the global antigenic and genetic evolution in swine influenza A viruses and evaluating the relative zoonotic potential to humans. Nicola Lewis

- O-889 Ocular-only aerosol inoculation of ferrets with H7 and H5 influenza viruses. Jessica Belser
- O-890 Characterization of the 2012 highly pathogenic avian influenza H7N3 virus isolated from poultry in Mexico: pathobiology and vaccine protection. David Suarez
- O-891 The first detection and isolation of avian influenza viruses in Antarctica. Aeron Hurt
- O-892 Detection of multiple genotypes of swine influenza viruses in southern China, 2009-2012. Huyi Liang
- O-893 Coordinated surveillance of influenza viruses in European pigs: enhanced virological and epidemiological analysis from the European Surveillance Network for Influenza in Pigs (ESNIP3). Sharon Brookes

**Workshop 6B: Surveillance I**  
Meeting Room 2.40 (Level Two)

**Chairs:** Sue Huang, Institute of Environmental Science and Research, Wellington, New Zealand  
Maria de Lourdes Aguiar Oliveira, Instituto Oswaldo Cruz, Fiocruz, Rio de Janeiro, Brazil

**Oral Presentations:**

- O-894 Southern hemisphere influenza and vaccine effectiveness research and surveillance (SHIVERS) in New Zealand. Sue Huang
- O-895 Applications of pyrosequencing in the molecular surveillance of influenza. Yi-Mo Deng
- O-896 The Global Influenza Hospital Surveillance Network (GIHSN): a step forward. Joan Puig-Barberà
- O-897 Etiology of two-years hospital-based surveillance of severe acute respiratory infection in Madagascar. Norosoa Harline Razanajatovo
- O-898 Establishing a web-based application for respiratory pathogen biosurveillance within a diverse global partner network. Michael J. Cooper
- O-899 Patterns of influenza circulation—Latin America and the Caribbean, 2010-2012. Mauricio Cerpa

**Workshop 6C: Clinical Management**  
Meeting Room 2.60 (Level Two)

**Chairs:** Arnold Monto, School of Public Health, University of Michigan, Ann Arbor, Michigan, United States of America  
Robin Mason, Respiratory Disease Branch, DMID/NAID/NIH, Bethesda, Maryland, United States of America

**Oral Presentations:**

- O-900 Post-pandemic Review of anti-Influenza Drug Effectiveness (PRIDE Study): an individual patient data (IPD) meta-analysis investigating the impact of antiviral use on severe patient outcomes during the 2009-2010 influenza A(H1N1)pdm09 pandemic. Stella Muthuri

- O-901 Indirect effects of oseltamivir treatment of an influenza-infected index case-patient on secondary household transmission: a randomized placebo-controlled clinical trial in a crowded urban area in Bangladesh. Alicia Fry
- O-902 Impact of pneumococcal co-infection on disease severity and antibiotic prescriptions in infants and children with influenza: an inception cohort study. Barbara Rath
- O-903 Drug dispensing practices for acute respiratory infections and availability of oseltamivir through pharmacies, in Dhaka, Bangladesh. Fahmida Chowdhury
- O-904 INSIGHT FLU002 and FLU003, an international cohort study of influenza A(H1N1)pdm09 virus infection, 2009-2012. Dominic Dwyer
- O-905 A phase 2, randomized, double blind, placebo-controlled, multicenter study evaluating the safety and pharmacokinetics of different dosing regimens of favipiravir (T-705) in adult subjects with uncomplicated influenza. Carol Epstein

17.30-21.00

## Poster Reception—Group 2

Exhibition Hall 2 (Level Zero)

### Walkabout Poster Session II

Starting at poster LBA-P2-056

18.00-19.00

### Surveillance

Host:

David Swayne, United States Department of Agriculture—Agricultural Research, Southeast Poultry Research Laboratory, Athens, Georgia, United States of America

Posters:

- LBA-P2-057 Molecular epidemiology of influenza A virus infections in swine at agricultural fairs in the United States. Andrew Bowman
- P2-495 Did intensified surveillance lead to increased detection of human infections with highly pathogenic avian influenza A(H5N1) virus in East Jakarta, Indonesia? Amalya Mangiri
- P2-496 Risk analysis of a novel avian H3N8 virus isolated from harbor seals. Erik Karlsson
- P2-602 Shedding duration: the key risk factor for spread of highly pathogenic H5N1 avian influenza viruses over long distances by ducks? Mariette Ducatez
- P2-603 Susceptibility of bank voles (*Myodes glareolus*) to infection with H5N1 and H7N1 highly pathogenic avian influenza viruses. Aurora Romero Tejeda
- P2-690 Etiology of community-acquired pneumonia among hospitalized children in the United States: preliminary data from the CDC Etiology of Pneumonia in the Community (EPIC) study. Seema Jain
- P2-691 The role of influenza infection and other respiratory pathogens: a contribution for improving surveillance of maternal mortality. Maria de Lourdes Aguiar Oliveira
- P2-692 Setting up of a surveillance platform for acute respiratory infections in rural North India. Ritvik Amarchand

P2-693 Epidemiologic, laboratory, and clinical characteristics of human cases of influenza A/H5N1 in Vietnam, 2003- 2013. Nguyen Yen

19.00-20.00

Therapies, Diagnostics, and Management

Host: Wolfgang Preiser, Stellenbosch University and National Health Laboratory Service, Stellenbosch, South Africa

Posters:

- LBA-P2-056 Cost-effectiveness of a quadrivalent versus trivalent influenza vaccine in the United States. Pieter de Boer
- P2-463 Patterns of influenza A/H1N1 infection and immunity in the Netherlands before and after the 2009 pandemic by analysis of cross-sectional hemagglutinin microarray data. Michiel van Boven
- P2-464 Estimating the protective effect of hemagglutination-inhibition antibody against pandemic influenza A(H1N1) infections. Joseph Wu
- P2-548 A universal influenza virus vaccine based on the stalk domain of the hemagglutinin. Florian Krammer
- P2-549 Live virus and vector-based influenza vaccines for induction of antibodies specific for stalk domain of hemagglutinin. Eun Hye Kim
- P2-568 Subtyping and H275Y oseltamivir-resistant H1N1pdm09 influenza virus detection by xTAG fluorescent beads technology. Kirill Krasnoslobodtsev
- P2-569 Development of monoclonal antibodies specific for H5 HA and their application to rapid detection of influenza A/H5N1 virus. Hitoshi Takahashi
- P2-614 Predicting mortality among hospitalized children with respiratory illness in western Kenya, 2009 -2012. Gideon Emukule
- P2-615 Physician's knowledge, attitudes, and practices for pandemic, seasonal, and avian influenza in Indonesia. Amalya Mangiri
- P2-713 Is it possible to fight influenza by targeting intracellular redox state? Anna Teresa Palamara
- P2-714 Therapeutic or prophylactic treatment with an HA-stem antibody (VIS410) limits respiratory droplet transmission of influenza virus in the ferret model. Kanta Subbarao

Monday, 9 September 2013

09.00-9.40

Cross-Cutting Keynote:  
Ballroom East (Level One)

Host Genetics of Human Influenza  
*Paul Kellam, Wellcome Trust Sanger Institute, Hinxton, Cambridge,  
United Kingdom*

09.40-11.00

## Morning Plenary Session 4—Therapeutic Interventions

Ballroom East (Level One)

Chair:

Stephan Ludwig, University of Muenster, Muenster, Germany

Overview on Existing Therapies/Clinical Experience With  
Neuraminidase Inhibitors

*Michael Ison, Northwestern University, Evanston, Illinois,  
United States of America*

Overview on the Role of Immunomodulation, Cellular Factors,  
and Proteases

*Béatrice Riteau, Faculte de Medecine de Laennec, Unité VirPath  
Lyon, France*

Polymerase Inhibitors

*Martin Schwemmle, University Hospital Freiburg, Freiburg, Germany*

11.00-11.30

Morning Networking and Refreshment  
Exhibition Hall 2 (Level Zero)

11.30-13.00

## Mid-Day Plenary Session 4—Vaccines

Ballroom East (Level One)

Chair:

Nancy Cox, WHO Collaborating Center for Surveillance Epidemiology  
and Control of Influenza, Coordinating Center for Infectious Diseases,  
Centers for Disease Control and Prevention, Atlanta, Georgia,  
United States of America

Overview of Vaccine Effectiveness Issues and Controversies

*Alain Moren, EpiConcept, Paris, France*

Next Generation of Influenza Vaccines

*Rick Bright, HHS/OS/ASPR/ BARDA, Washington, District of Columbia,  
United States of America*

Clinical Aspects in the Development and Licensing of the Russian-Based  
Live Attenuated Influenza Vaccines for Pandemic Influenza Preparedness  
in Developing Countries

*Larisa Rudenko, Institute of Experimental Medicine of the NorthWest  
Branch of the Russian Academy of Medical Sciences, St Petersburg,  
Russia*

13.00-14.00

Lunch—on own

Monday

14.00-15.30

## Concurrent Morning Workshops—G

Workshop 7A: Late Breaking Abstracts  
Ballroom East (Level One)

**Chairs:** Kanta Subbarao, National Institutes of Health, Bethesda, Maryland, United States of America  
Diane Post, Respiratory Diseases Branch DMID/NIAID/NIH/DHHS, Bethesda, Maryland, United States of America

### Oral Presentations:

- LBA-O-001 Progress in building equitable influenza vaccine production capacity under the Global Action Plan (GAP) for influenza vaccines framework. Jan Hendriks
- LBA-O-002 Effectiveness of seasonal influenza vaccination of children in Senegal: year two of a cluster-randomized trial. John Victor
- LBA-O-003 Do changes in spirometry correlate with the severity and duration of infection in volunteers experimentally inoculated with influenza, RSV, and HRV in the Human Viral Challenge Model. John Forni
- LBA-O-004 The association of age and clinical disease in ferrets infected with influenza A viruses. Kanta Subbarao
- LBA-O-005 Patterns of genetic reassortment between endemic swine influenza viruses and pandemic A(H1N1)2009 viruses in Vietnamese pig population. Nobuhiro Takemae
- LBA-O-006 A mouse model to assess the utility of antiviral treatments for prevention of contact-dependent transmission of influenza A virus. Kathryn Edenborough

Workshop 7B: Surveillance II  
Meeting Room 2.40 (Level Two)

**Chairs:** Mark Tompkins, University of Georgia, Athens, Georgia, United States of America  
Pedro Jimenez-Bluhm, School of Veterinary Medicine, University of Wisconsin-Madison, Madison, Wisconsin, United States of America

### Oral Presentations:

- O-906 Incursion of clade 2.3.2.1 avian influenza viruses into the Mekong Delta of Vietnam. Julie Bryant
- O-907 Improving the representativeness of influenza viruses to inform seasonal influenza vaccine strain selection. Caroline Brown
- O-908 Influenza epidemiology in Bangladesh: a pre- and post-pandemic comparison of the national hospital-based influenza surveillance findings (2007-2013). Mohammad Aleem
- O-909 Surveillance and characterization of influenza viruses circulating in the central region of Chile. Pedro Jimenez-Bluhm
- O-910 WHO efforts on global capacity of influenza virus detection and anti-viral susceptibility monitoring. Terry Besselaar

- O-911      Circulating seasonal and pandemic influenza A and influenza B virus genotypes from 2009-2012: vaccine strain match and break-through infections in South Africa. Florette Treurnicht
- 

Workshop 7C: Novel Therapeutics  
Meeting Room 2.60 (Level Two)

Chairs:                      Oliver Planz, Eberhard Karls University, Tübingen, Germany  
Tatiana Branovich, St. Jude Children's Research Hospital, Memphis,  
Tennessee, United States of America

Oral Presentation:

- O-913      TCN-032 (anti-M2e mAb) treatment leads to reductions in clinical symptoms and viral shedding in a human influenza challenge study. Eleanor Ramos
- O-914      Carrageenan, a broad anti-viral active polymer, in combination with a specific influenza inhibitor—a novel concept for therapeutic interventions. Sabine Nakowitsch
- O-915      Resistance to a novel antiviral drug T-705 through increased fidelity of influenza A virus polymerase. Tatiana Baranovich
- O-916      A novel antiviral drug Ingavirin® restores the cellular antiviral response in influenza A virus infected cells and enhances viral clearance in ferrets. Andrej Egorov
- O-917      Influenza viruses and host cell signaling—identification and preclinical evaluation of novel targets for antiviral therapy. Oliver Planz
- O-912      Host gene discovery and drug repurposing for treatment of emerging and re-emerging influenza virus. Mark Tompkins

15.30-16.00                      Afternoon Networking and Refreshment  
Exhibition Hall 2 (Level Zero)

16.00-17.30                      **Closing Plenary Session—Public Health**  
Ballroom East (Level One)

Chair:                              Marc Mendelson, Groote Schuur Hospital, University of Cape Town,  
Cape Town, South Africa

Usefulness of Modeling for Decision Making on Influenza  
*Guy Walker, Department of Health, London, United Kingdom*

Non-Pharmaceutical Interventions—Effectiveness and Consequences  
*Benjamin Cowling, University of Hong Kong, Hong Kong, China, SAR*

Update on Global Vaccine Policy  
*Marie-Paule Kieny, World Health Organization, Geneva, Switzerland*

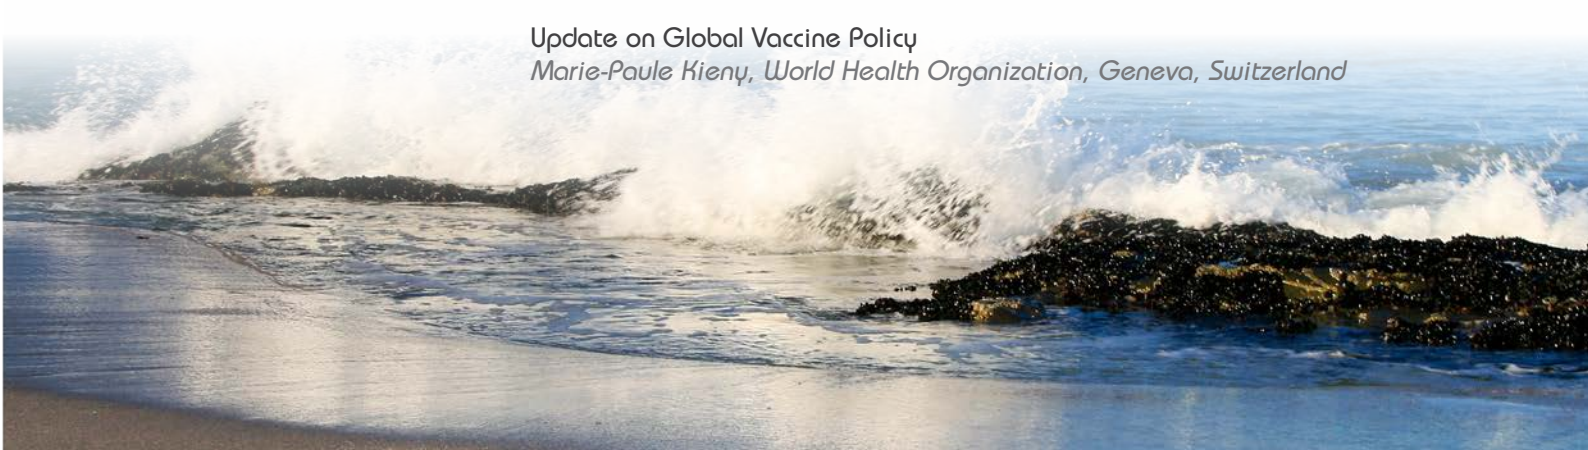

# Speaker Presentations

Morning Plenary Session 1 – Virology

Thursday, 5 September

09.40

Accessory genes in influenza A virus

Paul Digard, The Roslin Institute, University of Edinburgh, Easter Bush, Midlothian EH25 9RG, UK

"The influenza virus genome consists of eight segments of single-stranded, negative sense RNA that encode a total of 10 identified polypeptides".

Variations on this statement appear in the introduction of countless molecular virology papers published on influenza A virus (IAV) over the last 30 years. In 2001, the wording had to be updated to "a total of 11 polypeptides", following the discovery of PB1-F2. In 2009 a twelfth primary translation product (PB1-N40) was characterised and since then there has been a multitude of new IAV gene products identified: PA-X, PA-N155, PA-N182, M42, NS3 and others, that could potentially raise the known IAV proteome to over 20. The functions of these polypeptides are not fully characterized, but patterns are beginning to emerge; these newly identified species are often made in low abundance, are non-essential for virus replication but nevertheless affect pathogenicity, and are encoded/expressed by a variable and sometimes low percentage of IAV strains. This talk will summarise some of this data and explain the rationale for altering the standard introduction to:

"The influenza A virus genome consists of eight segments of single-stranded, negative sense RNA that encode a total of 10 identified core polypeptides and a variable, strain-dependent number of accessory proteins".

Gülsah Gabriel, Heinrich-Pette-Institute, Leibniz Institute for Experimental Virology  
Hamburg, Germany

Influenza A viruses continue to pose a serious threat to humans due to their ability to cross species barriers, as repeatedly illustrated by pandemics and occasional transmissions of avian influenza viruses of various subtypes (such as H5N1 or H7N9). Interspecies transmission is a complex process which involves a highly orchestrated series of numerous interactions between viral and cellular factors. The cell membrane forms one of the first barriers to be overcome upon avian-mammalian adaptation. Therefore, avian influenza viruses need to switch receptor specificity by acquisition of adaptive mutations in their receptor binding protein, the hemagglutinin. After cell entry, the nuclear envelope presents another major barrier to be crossed by the viral polymerase complex in order to enter the nucleus where viral transcription and replication takes place. Therefore, avian polymerase complexes need to switch their specificity to recognize nuclear import components of the mammalian host.

There is increasing evidence that components of the nuclear import machinery, the import  $\alpha$  proteins, play a crucial role in influenza virus host adaptation. Here, we discuss recent studies and explore the emerging role of importin- $\alpha$  isoforms in bridging pre- and post-nuclear import processes and their impact on influenza virus host adaptation and pathogenesis.

**Mx restriction of influenza viruses****Otto Haller**, Department of Virology, University of Freiburg, Freiburg, Germany

Innate immune responses play a key role in containing influenza A viruses (FLUAV) in the infected host. In some species, Mx proteins are the main interferon-induced restriction factors blocking FLUAV<sup>1</sup>. Mx proteins belong to the dynamin family of large GTPases and consist of three functional domains, namely (i) the aminoterminal "G domain" that binds and hydrolyses GTP, (ii) the central "bundle signaling element" which connects the "G domain" to the "stalk" and (iii) the "stalk" which mediates self-assembly into highly ordered oligomeric rings required for antiviral action<sup>2</sup>. Using an evolutionary approach, the unstructured loop L4 protruding from the compact stalk was identified as the interface responsible for viral target recognition<sup>3</sup>. We propose that MxA binds via loop L4 to the viral nucleoprotein NP and then oligomerizes around the viral nucleocapsid, leading to impairment of its replicative function. Interestingly, influenza A virus strains differ in their Mx sensitivities. Avian strains have high and human strains have low sensitivities towards human MxA, suggesting a degree of MxA adaptation. We identified adaptive mutations in the nucleoprotein (NP) of pandemic strains A/Brevig Mission/1/1918 and A/Hamburg/4/2009 that confer MxA resistance. These resistance-associated amino acids in NP differ between the two pandemic strains but form a similar discrete surface-exposed cluster in the body domain of NP, indicating that MxA resistance evolved independently. We conclude that human MxA represents a barrier against zoonotic introduction of avian influenza viruses into the human population and that adaptive mutations in the viral NP should be carefully monitored.

1) Haller, O, Kochs, G, J Interferon & Cytokine Research 31: 79-87 (2011), review

2) Gao, S, Von der Malsburg, A, et al. Immunity 35: 514-525 (2011)

3) Mitchell PS, Patzina C et al., Cell Host & Microbe 12, 598-604 (2012)

**Mammalian adaptation of influenza viruses: what we know and what we don't.****Terrence M. Tumpey**, Immunology and Pathogenesis Branch, Influenza Division, National Center for Immunization and Respiratory Diseases, Centers for Disease Control and Prevention, Atlanta, Georgia

Avian influenza viruses are capable of causing significant human illness and death, and continue to pose a pandemic threat to human health should they acquire a transmissible phenotype. Due to the expanding host and geographic range of avian influenza viruses, such as H5 and H7 subtypes, researchers aim to better understand the contribution of both virus and host responses involved in mammalian adaptation of influenza viruses. The use of small mammalian models has become indispensable for understanding the contributions of influenza virus genes and molecular determinants responsible for transmission and host disease. Ferrets and guinea pigs have become the primary models of choice for studying the molecular determinants responsible for efficient transmission, despite a general lack of available immunological reagents. Conversely, mice have been used extensively for the assessment of pathogenesis and virus-host responses. This work will highlight phenotypes of novel emerging avian influenza viruses in mammals and review the contributions of virus genes and molecular determinants involved in efficient transmissibility of influenza viruses. Influenza viruses continue to emerge and cause human infection, so there remains a need to better understand the pathogenicity and transmission of potentially pandemic influenza viruses so that we may develop improved methods for their prevention and control. play a crucial role in influenza virus host adaptation. Here, we discuss recent studies and explore the emerging role of importin- isoforms in bridging pre- and post-nuclear import processes and their impact on influenza virus host adaptation and pathogenesis.

**Detection of Novel Influenza Viruses in the United States by Real-Time RT-PCR****S. Lindstrom, Influenza Division, Centers for Disease Control and Prevention, Atlanta, GA, USA**

Influenza laboratory surveillance and diagnosis testing systems that perform routine subtype characterization of seasonal human influenza A viruses facilitate the detection of novel influenza A viruses of animal origin that do not normally infect humans. In recent years, molecular diagnostic methods utilizing real-time RT-PCR (rRT-PCR) have improved the capability and timeliness for laboratories to identify influenza viruses. The Centers for Disease Control and Prevention (CDC), U.S.A. developed and implemented the Human Influenza Virus rRT-PCR Detection and Characterization Panel (CDC rRT-PCR Flu Panel), an assay for rapid detection and characterization of human influenza viruses designed for universal detection of all influenza type A and type B viruses as well as identification human A/H1, A/H1pdm09 and A/H3, as well as Asian avian A/H5. Laboratories using the CDC rRT-PCR Flu Panel are able to identify novel influenza virus infections in humans, such as avian A/H5, A/H7 or A/H9, when influenza A viruses are detected that cannot be characterized as human influenza A/H1, A/H1pdm09 or A/H3 viruses and are reported as "unsubtypable". Also, since 2009, public health laboratories (PHLs) in the United States (US) that received training and reagent support to use the CDC rRT-PCR Flu Panel have periodically reported human specimens as "inconclusive" that were positive for InflA, H3, and pdmInflA markers and negative for H1 and pdmH1 markers and were subsequently identified as A/H3N2v viruses similar to those circulating in swine in the US. In 2012, the CDC reported a total of 309 A/H3N2v cases from 12 states that were all initially identified as "inconclusive" by state PHLs using the CDC Flu rRT-PCR Panel. Furthermore, analytical and clinical performance evaluation demonstrated that the CDC Flu rRT-PCR Panel is able to accurately detect the A/H3N2v virus in clinical specimens in the US. CDC subsequently obtained FDA clearance that allows US PHLs to report test results that are positive for InflA, H3 and H1pdm09 markers, and negative for H1 and H1pdm09 markers as "presumptive positive" for A/H3N2v virus.

Ongoing efforts to improve the capacity for molecular testing using real-time RT-PCR allow for improved response and rapid detection of novel influenza strains in humans. However, as influenza viruses evolve, it is necessary to monitor the performance of diagnostic tests against circulating viruses and to provide updated reagents and protocols as well as guidelines for interpretation of test results when necessary.

**Influenza whole genome analysis and its role in diagnostics, patient care, and public health****Dr Monica Galiano, Virus Reference Department, Public Health England, London, United Kingdom**

The development of high-throughput sequencing and whole genome analyses has improved our understanding of global influenza molecular genetics and epidemiology, resulting in a valuable tool for influenza scientific research. From the perspective of an influenza reference and diagnostic laboratory, viral genome sequences have been increasingly used to supplement influenza virus strain surveillance, to aid in the design and evaluation of new molecular diagnostic assays and has also enabled the study of different aspects such as outbreak investigations and identification of genetic markers associated with virulence, transmissibility, antiviral resistance and other biological features which are of great interest in our field. Furthermore, next-generation sequencing provides high speed and throughput with an unprecedented volume of output data, with the potential for many possible applications in both research and diagnostic settings.

We will discuss the utility and impact of whole genome sequencing of influenza as a routine tool in the laboratory setting, from the day-to-day molecular diagnostics for seasonal influenza viruses to the more challenging task of identifying and characterising novel emergent influenza strains with pandemic potential.

#### Clinical relevance of influenza viral load measurement

Nelson Lee, Stanley Ho Center for Emerging Infectious Diseases, The Chinese University of Hong Kong, Hong Kong SAR, PRC

Quantitative PCR (qPCR) has been used for rapid virus detection in respiratory and non-respiratory clinical samples and to reflect the virus burden ('viral load') in influenza patients. There is also a recent trend to use qPCR results to guide treatment decisions, to monitor response, and to estimate transmissibility of infection in the hospitalized. Our experience and review of available data suggest that: (1) qPCR is more sensitive than culture for virus detection in symptomatic patients; (2) results can be influenced by the differences in virokinetic profiles in the upper and lower respiratory tracts; (3) interpretation of results concerning non-respiratory samples is difficult due to unknown sensitivity and specificity; (4) some correlations exist between 'viral load' and disease severity, clinical progress, and cytokine expression (e.g. symptom scores, influenza complications, duration of illness, interleukin(IL)-6), but confounded by multiple factors such as time interval from illness onset; (5) serial monitoring may assist early detection of secondary antiviral resistance. The use of qPCR result as an 'end-point' in clinical trials has remained controversial. Understanding these limitations and consideration of the clinical context may help healthcare practitioners to correctly interpret qPCR results.

#### Related works

- 1) Lee N, Chan PK, Hui DS, et al. Viral loads and duration of viral shedding in adult patients hospitalized with influenza. *J Infect Dis*. 2009;200(4):492-500.
- 2) Lee N, Chan PK, Wong CK, et al. Slow viral clearance and hyperactivated inflammatory responses in adults hospitalized for severe pandemic 2009 influenza A(H1N1) virus pneumonia. *Antivir Ther* 2011;16:237-47.
- 3) Chan MCW, Lee N, Chan PK, et al. Seasonal Influenza A Virus in Feces of Hospitalized Adults. *Emerg Infect Dis* 2011;17:2038-42.
- 4) Lee N, Wong CK, Chan PK, et al. Acute encephalopathy associated with influenza A infection in adults. *Emerg Infect Dis*. 2010;16(1):139-42.
- 5) Lee N, Wong CK, Hui DSC, et al. Role of Human Toll-like Receptors in Naturally Occurring Influenza A Infections. *Influenza Other Resp Vir*, 2013 Apr 1. doi: 10.1111/irv.12109
- 6) Hui DS, Lee N, Chan PK. Clinical management of pandemic 2009 influenza A(H1N1) infection. *Chest*. 2010;137(4):916-25.

#### Influenza and pregnancy

S Saito, Department of OB/GYN, University of Toyama, Toyama-shi, Toyama, Japan

Objective: Pregnant women are prone to serious complications when they contract pandemic (H1N1) 2009 influenza, and a considerable number of infected pregnant women died worldwide. However, no maternal mortality occurred in Japan during this pandemic. We discuss the reasons why maternal mortality did not occur in Japan. Clinical data: Mortality of pregnant women infected with pandemic influenza A (H1N1) was several times higher compared with that in nonpregnant women in many countries. Compared with nonpregnant individuals, pregnant women are approximately 4-5 times more likely to develop severe disease, with the highest risk occurring in the third trimester. However, no maternal mortality was observed among pregnant Japanese women. We discuss what factors contributed to the lack of maternal mortality in Japan during this pandemic. Total 53 maternal death cases in 1.10 million of total birth and 45 maternal death cases in 1.10 million of total birth maternal were reported in 2009 and 2010, respectively, in Japan. National data showed no maternal mortality due to pandemic (H1N1) 2009 among pregnant Japanese women in 2009 and 2010. The Japan Society of Obstetrics and Gynecology (JSOG) recommended the following; (i) prompt use of antiviral drugs for treatment of

pregnant women on May 8, 2009 via website, (ii) an early visit to the general practitioner when they run a high temperature on June 16, 2009, (iii) active use of antiviral drugs for prophylaxis after close contact with an infected person on Aug 4, 2009, and (iv) vaccination against the pandemic (H1N1) 2009 strain on Sept 7, 2009. The number of visit to the JSOG website increased to 193,705 in Oct 2009. Yamada's paper (*JOGR. 2012;38:130-136*) showed that antiviral medicines for prophylaxis was performed in 40,000-50,000 pregnant women, and 60% of pregnant women were vaccinated within 1.5 months after availability of a vaccine against pandemic H1N1 influenza. These treatment reduced the infection rate in Japanese pregnant women from general infection rate in Japan; 12% to 3.5% in pregnant women. Nakai et al. (*J Infect. 2011;62:232-233*) reported the clinical data of 181 hospitalized women in Japan. These cases covered around 70% of pregnant women in Japan. Seventeen (9.4%) developed pneumonia, 2 of these required admission to an ICU, and all 181 cases recovered completely. These rates were quite low compared with those in other countries. Over 90% of infected cases were treated with antiviral agents within 48 h, and pregnant women who received antiviral agents after 48 h were 5.8 times more likely to develop pneumonitis than those in early treatment group. We have reported that short-term prognosis of infants exposed to oseltamivir or zanamivir in utero were not adversely affected (Saito S, et al. *Am J Obstet Gynecol.* 2013. doi: 10.1016/j.ajog.2013.04.007). Conclusion: 1) The information on the website is very effective to inform the prevention and treatment of influenza to common citizen. 2) High rate of vaccination to pregnant women, antiviral medicines for prophylaxis and antiviral medicines within 48 h after onset are effective to reduce the maternal complications and maternal mortality. 3) The safeties of vaccination and oseltamivir to pregnant women have been reported.

#### Overview on the role of immunomodulation, cellular factors and proteases

B. Riteau, EA4610, University Lyon, France

Influenza is one of the most common infectious diseases in humans occurring as seasonal epidemic and sporadic pandemic outbreaks. To date, unfortunately, our current repertoire of antiviral remedies against these pathogens is limited to two approved classes of compounds, to which a drastic increase in viral resistance has occurred in recent years. The major reason for the rapid acquirement of mutations that allow influenza viruses to replicate in the presence of the licensed anti-influenza drugs is that these compounds target viral proteins in the face of a high viral mutation rate, making these substances unsecure. Therefore to fight against Flu, our efforts should include the production of new or improved influenza antiviral drugs against a broad range of influenza strains and that limit the emergence of resistance viruses.

To overcome this challenge of resistance, molecules that target cellular factors instead of the virus are of particular interest. Two different strategies attempting to find novel host target to fight influenza viruses exists; ie: slowing down virus replication or modulating the innate immune response. The first strategy is based on the strong dependency of influenza viruses to cellular host factors at different steps of the virus cycle. The second one is based on the observation that the hallmark of influenza pathogenesis is due to a deleterious inflammation of the lungs. Here we will give an overview of the current research on this topic and will focus in particular on protease-activated-receptor 1 and plasminogen as promising new strategies to fight influenza.

Inhibitors of the influenza virus replication machinery  
M. Schwemmler, University Hospital Freiburg, Freiburg, Germany

Influenza is a highly contagious acute viral infection, which causes annual epidemics as well as devastating pandemics. As shown for H5N1 and H7N9 viruses, avian influenza A viruses can sporadically transmit into the human population, causing severe disease symptoms and death. To date, only few approved antivirals, like the well-known neuraminidase inhibitors, are available that protect from influenza viruses and its associated disease symptoms. However, due to the frequent emergence of drug resistant virus strains there is an urgent need for the development of alternative antivirals. The viral polymerase machinery responsible for the amplification of the viral genome and mRNA transcription represents an attractive target. Indeed, recent structural and functional insights into the replication strategy of influenza viruses as well as high throughput screening assays revealed new antiviral compounds that specifically block influenza virus replication.

Mid day Plenary Session – 4, Vaccines

Monday, 9 September

11.30

Clinical aspects in the development and licensing of the Russian-based live attenuated influenza vaccines for pandemic influenza preparedness in developing countries  
L. Rudenko, Institute of Experimental Medicine (IEM), St. Petersburg, Russia

Background: Live attenuated influenza vaccines (LAIVs) generated by IEM have been used in Russia in all age groups since 1987. Production of LAIVs is based on the classic reassortment methodology, ie, 6 genes from an attenuated donor backbone strain are combined with genes coding for hemagglutinin and neuraminidase of circulating influenza virus strains. Currently all licensed LAIVs are produced in embryonated eggs. From 1997, when highly pathogenic avian influenza viruses began to circulate in Asia, IEM concentrated on the development of candidate pandemic LAIVs. The first pandemic H5N2 vaccine was registered in Russia in 2008. Further development relating to H5N1, H7N3 and H2N2-based candidate vaccines are in progress in different stages within a collaborative agreement with PATH. A major initiative launched by the World Health Organization (WHO) to meet the Global Pandemic Influenza Action Plan objective to increase vaccine supply supported transfer of influenza vaccine production technology to developing countries. For pandemic surge capacity, egg-based LAIV manufacturing technology has clear advantages over inactivated influenza vaccine (IIV) with its significantly higher yield, needle-free delivery and benefits of wider cross-protection. This made LAIV an attractive option in developing countries, particularly those with very large populations. From 2009 WHO has granted access to the technology to 3 organizations—the Government Pharmaceutical Organization (GPO) in Thailand, the Serum Institute of India (SII), and BCIH in China. At the same time IEM signed an agreement with WHO for the supply of the Russian LAIV reassortants, provide training to staff and consulting to new users of the technology. Materials and Methods: LAIVs were produced by Russian Manufacture "Microgen" on the basis of the license agreement with IEM. We evaluated the safety, infectivity, genetic stability, transmission and immunogenicity of 2 doses of 107.0EID<sub>50</sub>/0.2 ml of A/17/California/2009/38 (H1N1), 107.6EID<sub>50</sub>/0.2 ml of A/17/mallard/Netherlands/00/95(H7N3), 108.5EID<sub>50</sub>/0.2 ml of A/17/turkey/Turkey/05/133 (H5N2) vaccines administrated by nasal spray 4 weeks apart to healthy volunteers in an inpatient isolation unit operated by the Institute of Influenza in St Petersburg. The total of 140 subjects were enrolled who received either vaccine or placebo. Results: The studies showed no significant adverse reactions attributable to the vaccines, and suggested that all tested vaccines are as safe as seasonal LAIV. For confirmation of genetic stability and transmissibility of LAIV post vaccination we assessed viral shedding, genotype and phenotype of shed viruses. It was confirmed that during replication of the vaccine virus in vivo, no reversion to the wild-type phenotype occurred. Vaccine viruses retained their phenotypic characteristics and did not revert at nucleotides known to confer an attenuated phenotype on the molecular level. Vaccine viruses were not detected among volunteers from placebo group, confirming no transmission from vaccinated to nonvaccinated volunteers. Results from the clinical studies also demonstrated that all pandemic candidates were effective in generating humoral and cellular immune responses. Cumulative data on immune responses which included not only

HAI and MN tests but also additional immunological methods such as measuring IgG and IgA by ELISA and cytokine assays showed that 80%-90% of vaccinated volunteers had serum and/or local antibodies and generated CD4+ and CD8+ immunological memory T-cells. Conclusion: In summary, preclinical and clinical data generated with prepandemic LAIV vaccines were transferred to partners from developing countries to facilitate the potential use of this promising vaccine technology to control epidemic and pandemic influenza outbreaks. SII registered its pandemic H1N1 LAIV in India in August 2010, and by November 2010, over 2.5 million people were vaccinated with this vaccine. SII is now in the process of registering its trivalent seasonal LAIV with vaccine strains developed by IEM. In 2011 GPO registered its pandemic LAIV. Both companies continue clinical trials, with seasonal LAIV among children 2-5 years old (SII) and with pandemic H5 (Phase II, GPO). BCIH finished preclinical studies for the seasonal LAIV and has applied for permission to initiate clinical trials among children, adults and elderly. This work was supported by PATH.

Closing Plenary Session – Public Health

Monday, 9 September

16.00

Update on global vaccine policy

**Marie-Paule KIENY**, Assistant Director-General, Health Systems and Innovation, World Health Organization (WHO)

The Global action plan for influenza vaccines (GAP) which aims to address equitable access to and evidence-based use of influenza vaccines to protect populations against seasonal or pandemic influenza is built on three pillars (increase in seasonal vaccine use; increase in global influenza vaccine production capacity; and promotion of further research and development). These three pillars, , are intimately linked to, and are to a large extent dependent on the formulation and adoption of evidence-based policies on influenza vaccine use. Such policies need to take into account influenza disease burden and vaccine effectiveness in different segments of the population. These policies, in conjunction with consideration of competing priorities, will drive national decisions on influenza vaccine procurement and use, which in turn will drive increase or decrease of vaccine production capacity. Likewise, recognition of the relatively limited effectiveness of current vaccines in some populations is a potent motivation for research and development of novel vaccine formulations.

At this moment, only a limited number of countries have seasonal influenza vaccine in their national immunization programme, and even fewer are on target to meet the target of 75% coverage in the elderly following resolution WHA56.19 adopted in 2003. The WHO Strategic Advisory Group of Experts on Immunization (SAGE) has reviewed the evidence of vaccine burden, performance, cost effectiveness and operational issues for specific target populations and risk groups and has issued in 2012 global recommendations for influenza vaccination in five priority groups including: pregnant women, health care workers, children under 5, elderly, and people with underlying health conditions. For each of these groups, the evidence supporting influenza vaccine use has been evaluated, and grade tables rating the quality of the evidence in support of the recommendations produced, identifying the knowledge gaps and research to be conducted to fill these gaps. The knowledge gaps include for example current limited data on vaccine efficacy in some of the target groups, lack of results obtained in placebo-controlled clinical trials, small trial sizes, bias in the trials, limited safety assessments. Some of the recommendations themselves create challenges that need to be addressed, such as assuring year-round supply of vaccines for pregnant women, and ensuring that the product inserts are compatible with this policy.

These global recommendations can be used by countries to inform national vaccine policies. Amongst the challenges to implementing any influenza vaccine policy is the access to affordable vaccine and the cost of delivery in the face of other health priorities. WHO monitors the global vaccine production capacity which has grown from 500 million doses in 2006 to over 1.4 billion doses in 2012. While this capacity meets current seasonal vaccine demand, it would be insufficient to meet the demand for vaccine in the event of a pandemic. To address this constraint,

WHO has facilitated the establishment of vaccine production in 14 low- and middle-income countries across all regions of the world, not only increasing global capacity, but facilitating a measure of regional independence.

The currently used manufacturing technologies face a significant time-lag between identification of a pandemic threat and supply of candidate vaccine strains and necessary reagents for vaccine release; manufacturing capacity is limited by the technology. Moreover, the need to produce vaccines in response to annually changing strains adds enormously to the cost of influenza vaccination compared to other vaccines. New technologies to address these challenges are emerging – ranging from adjuvants to permit dose sparing and expand capacity, to recombinant vaccines which can be manufactured and released rapidly, and hopefully one day to vaccines that will not have to be changed and administered annually. All of these will affect the dynamics of vaccine supply, efficacy and cost effectiveness, which will in turn affect policy implementation, and result in improved health worldwide.

An update on WHO global influenza vaccine policy will be discussed, focusing on the three GAP pillars.

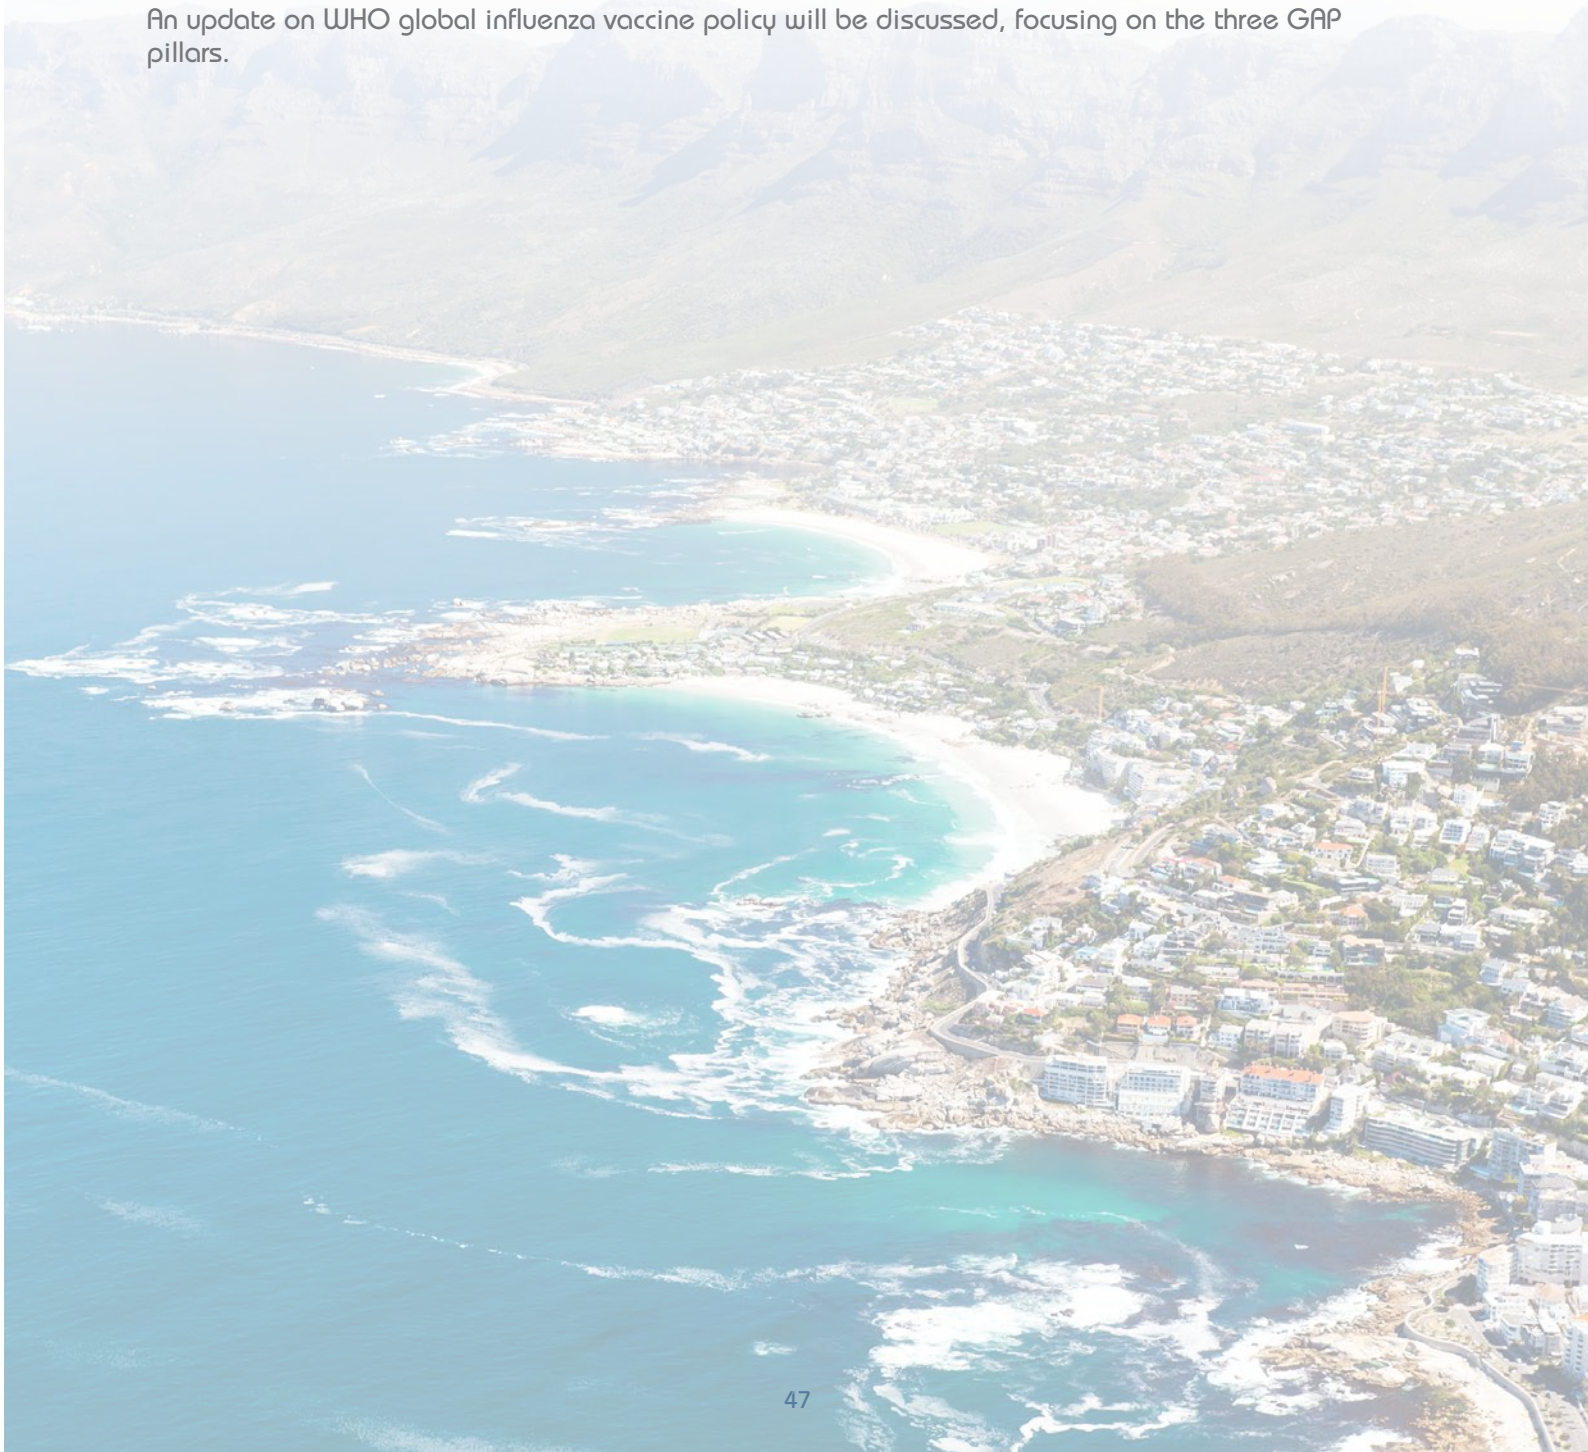

# Sightseeing and Special Tours

The *Options* conference has taken place in many locations around the world, and cultural events have always been an important part of the conference experience. Cultural tours allow the *Options* conference to give back to its host city, and also provide delegates with once-in-a-lifetime experiences. This year, a variety of tours will be available to all attendees to experience during and after the meeting. A selection of tour options have been arranged with special prices negotiated for the delegates. These tours are at the discretion of the delegate and fees will apply.

## Half-Day Tours

### City Tour

This guided tour takes delegates to Table Mountain, Green Market Square, and many other famous Cape Town landmarks.

### Cape Point Tour

Enjoy scenic views of the Atlantic Ocean en route to Hout Bay. This tour will take delegates over the famous Chapman's Peak drive to Cape Point where the Atlantic Ocean meets the Indian Ocean.

### Winelands Tour

Delegates on this tour can experience wine tasting and a cellar tour at Anura Wine Estate, followed by a historic tour of Stellenbosch.

### Township Tour

This guided tour will allow delegates to observe daily life in several of the townships around Cape Town, including Langa, Nyanga, Crossroads, and Gugulethu. A visit to the District Six museum is also included. A township tour on bicycles that have been renovated by members of the local community is also available.

### Kirstenbosch Botanical Garden Tour

Visit this world-renowned botanical garden set against the backdrop of Table Mountain and Devil's Peak. This garden is home to over 22,000 indigenous plants.

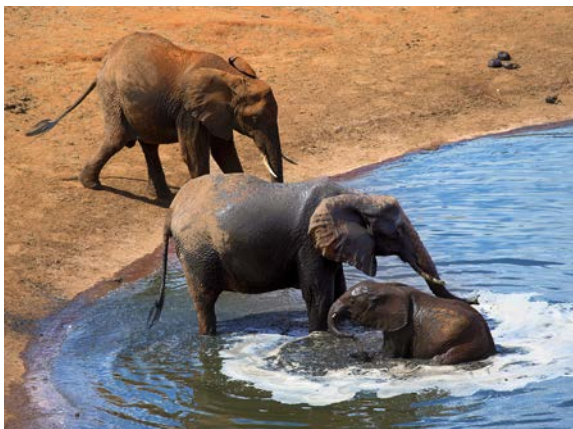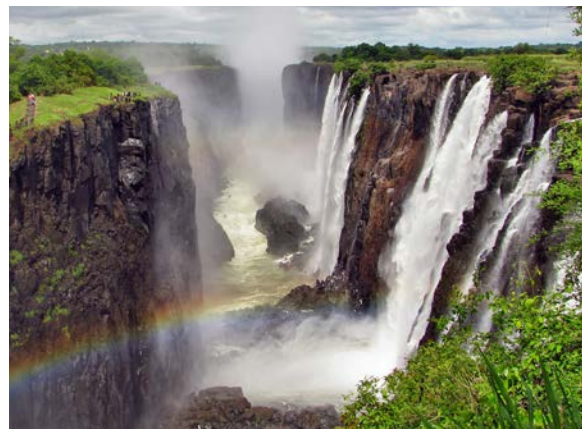

## Scenic Helicopter Tour

Take off on an adventure along the Atlantic seaboard! Delegates will experience a 30-minute helicopter flight following the coastline through Bantry Bay, Clifton, Camps Bay, and the 12 Apostles.

## Full-Day Tours

Many of the above half-day tours can be expanded in to full-day tours. Other full-day tours include a cultural tour of the townships combined with a tour of Robben Island, the Whales and Wine tour in Hermanus, and a safari at Aquila Game Reserve.

For more information on any of these tours, please visit the hospitality desk

Options VIII is pleased to present the official conference destination management company Dragon Fly, Southern Africa's Leading Travel Company.

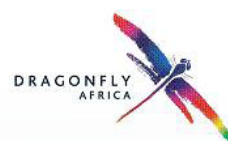

Dragon Fly has a range of tours options with specially negotiated prices for the delegates to take on the free Saturday afternoon and they can also assist with dinner reservations, ground transfers and local entertainment. These tours are at the discretion of the delegate and fees apply. Please stop by their hospitality desk in the registration area.

### Hospitality Desk Hours

|                        |             |
|------------------------|-------------|
| Wednesday, 4 September | 13.00-17.00 |
| Thursday, 5 September  | 09.00-17.00 |
| Friday, 6 September    | 09.00-17.00 |
| Saturday, 7 September  | 09.00-13.00 |
| Sunday, 8 September    | 09.00-17.00 |
| Monday, 9 September    | 09.00-17.00 |

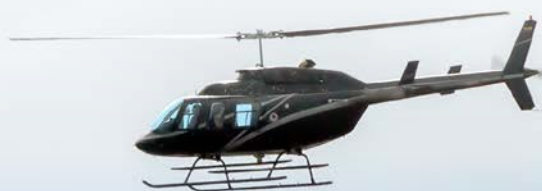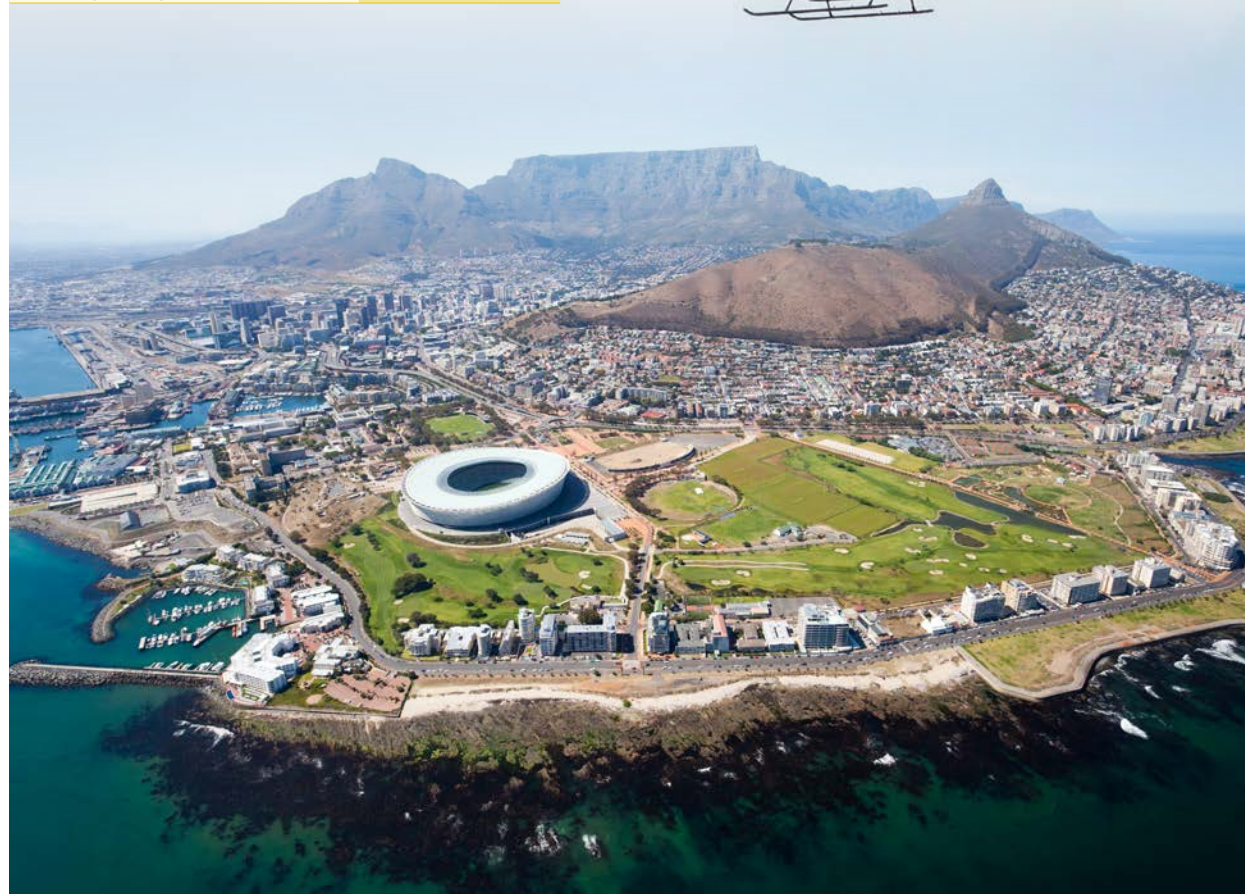

# Exhibitor Information

---

## GISAID Initiative, *a Global Initiative on Sharing All Influenza Data* Booth #:1

Address: Federal Office for Agriculture & Food (BLE)  
Deichmanns Ave 29  
City: Bonn  
Postal Code: 53179  
Country: Germany  
Phone: 02 28 99 6845 3080  
eMail: [contact@gisaid.org](mailto:contact@gisaid.org)  
URL: <http://gisaid.org>  
Contact: Cheryl Bennett, [cheryl@gisaid.org](mailto:cheryl@gisaid.org)

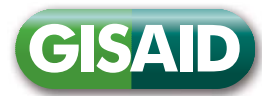

A Global Initiative on Sharing All Influenza Data

GISAID's publicly accessible EpiFlu™ database offers the largest collection of influenza sequences and associated metadata (clinical-epidemiological). Thousands of researchers collaborate and uphold GISAID's unique sharing mechanism by protecting the rights of data submitters. GISAID is used for the WHO's biannual vaccine-strain-selection and recently afforded the timely distribution of H7N9 data.

---

## International Society for Influenza and other Respiratory Virus Diseases (isirv) Booth #: 2

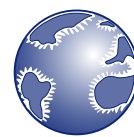

**isirv**  
International Society for  
Influenza and other  
Respiratory Virus Diseases

Address: 17 Sunnyfeld, Mill Hill  
City: London  
Postal Code: NW7 4RD  
Country: United Kingdom  
Phone: +44 020 8969 4830  
Fax: +44 020 8960 0069  
Website: [www.isirv.org](http://www.isirv.org)  
Contact: Paul Sommerfeld, [paulsommerfeld@isirv.org](mailto:paulsommerfeld@isirv.org)

The International Society for Influenza and other Respiratory Virus Diseases (isirv) is an independent scientific professional society promoting the prevention, detection, treatment, and control of influenza and other respiratory virus diseases. isirv plays a key role in the dissemination of information in this broad and challenging field by facilitating the interaction of scientists and public health specialists and by promoting international collaborative efforts against these diseases. Influenza and Other Respiratory Viruses is the official isirv journal and is the first journal to focus exclusively on influenza and other respiratory viruses.

## European Scientific Working group on Influenza (ESWI)

Booth #: 3

Address: Zevensterstraat 1  
City: Laarne  
Postal Code: 9270  
Country: Belgium  
Phone: 0032 475 81 38 59  
Contact: David dePooter (ESWI manager), david.depooter@eswi.org,  
Monica Symons, monica@semiotics.be

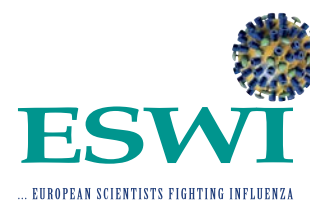

European Scientific Working group on Influenza (ESWI) is a multidisciplinary partnership of academia and stakeholder organizations representing healthcare professionals, public health officials, at-risk patients, and the elderly. ESWI's partners all share the aim to reduce the impact of influenza in Europe. [www.eswi.org](http://www.eswi.org) - [www.flucommunity.org](http://www.flucommunity.org)

## Quidel

Booth #: 4

Address: 10165 McKellar Court  
City: San Diego  
Country: California  
Postal Code: 92121  
Country: United States  
Phone: (858) 552-1100  
Fax: 858-646-8028  
Website: [www.quidel.com](http://www.quidel.com)  
Contact: Jim Baldrica, jbaldrlica@quidel.com

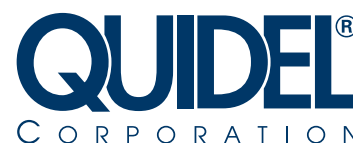

Quidel® Corporation enhances people's health and well-being through diagnostic solutions that can lead to improved patient outcomes and economic benefits for healthcare providers. With leading brands—QuickVue®, AmpliVue®, MicroVue™, D3 Direct Detection™, Thyretain®, Sofia®, and Quidel Molecular, Quidel's products aid in the detection and diagnosis of critical diseases and conditions. [www.quidel.com](http://www.quidel.com).

## MESH (*Measured Solutions for Health P/L*)

Booth #: 5

Address: PO Box 5127 Alphington  
City: Victoria  
Postal Code: 3078  
Country: Australia  
Phone: +61(0)4000 355 29  
Contact: Belinda Esperson, [measuredsolutions@bigpond.com](mailto:measuredsolutions@bigpond.com)  
Website: [flu-iiq.com](http://flu-iiq.com)

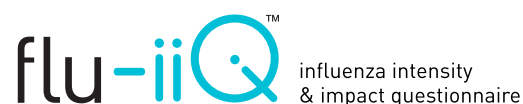

The flu-iiQ™ Influenza Intensity and Impact Questionnaire was developed to improve outcomes measurement in influenza clinical trials. It is a Patient Reported Outcomes (PRO) measure that meets strict PRO development and validation standards. The flu-iiQ™ is used as a primary or secondary outcomes measure and is available in 25+ languages.

## Longhorn Vaccines

Booth #: 7

Address: 2 Bethesda Metro Center  
City: Bethesda  
State: Maryland  
Postal Code: 20814  
Country: United States of America

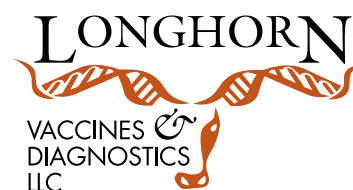

Longhorn Contact: Chris Helm, [chris@lhnvd.com](mailto:chris@lhnvd.com), +1.3014018388

MDG Health Solutions Contact: Bruce Manuel, [bruce@mdghealth.co.za](mailto:bruce@mdghealth.co.za), +27.725837988

Longhorn's Prime PCR System includes PrimeStore® MTM for safe collection, transportation, molecular diagnostics, gene sequencing, and storage of high-quality nucleic acid (RNA/DNA) samples at ambient temperature and PrimeMix® mastermix PCR assays for influenza A, B, H1, H3, H5, and other pathogens (MTB, Malaria). MDG Health Solutions is our African partner.

## Roche

Booth #: 8

Address: F. Hoffmann-La Roche AG  
Pharmaceuticals Division MGSM  
Bldg/Room74/4O.Z08.124  
Country: 4070 Basel  
eMail: [contact@gisaid.org](mailto:contact@gisaid.org)  
Website: [www.roche.com](http://www.roche.com)  
Contact: Sammy Su, [sammy.su@roche.com](mailto:sammy.su@roche.com)  
Clare Mills, [Clare.Mills@medex-media.com](mailto:Clare.Mills@medex-media.com)

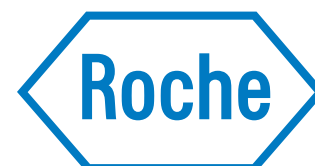

Roche is the world's largest biotech company, with truly differentiated medicines in oncology, infectious diseases, inflammation, metabolism, and neuroscience. Roche's personalised healthcare strategy aims at providing medicines and diagnostic tools that enable tangible improvements in the health, quality of life, and survival of patients.

## Sanofi Pasteur

Booth #: 9

Address: 2 Avenue Pont Pasteur  
City: Lyon  
Postal Code: 69007  
Country: France  
Website: [www.sanofipasteur.com](http://www.sanofipasteur.com)  
Contact: Hilda Aghaikian, [hilda.aghaikian@sanofipastuer.com](mailto:hilda.aghaikian@sanofipastuer.com)  
Celine Mecemmene, [celine.mecemmene2@sanofipasteur.com](mailto:celine.mecemmene2@sanofipasteur.com)

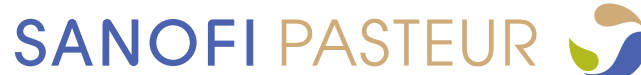

Sanofi Pasteur is the vaccines division of Sanofi. Our vision is a world in which no one suffers or dies from a vaccine-preventable disease. Sanofi Pasteur is the largest company in the world devoted entirely to human vaccines. We distribute more than 1 billion doses of vaccine per year, making it possible to vaccinate more than 500 million people across the globe.

The *Options for the Control of Influenza VIII* Organizing Committee and Scientific Program Committee would also like to thank the following exhibitors and sponsors for their participation in *Options VIII*.

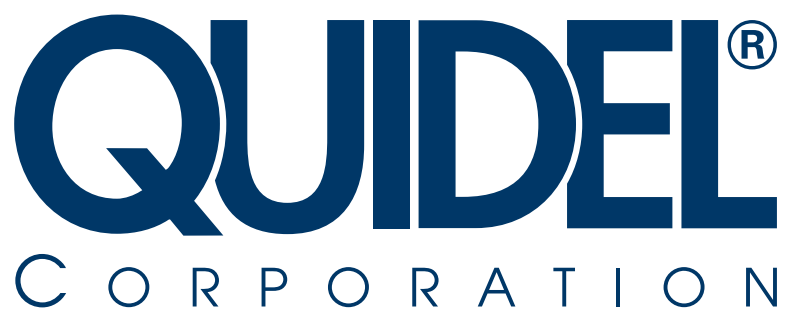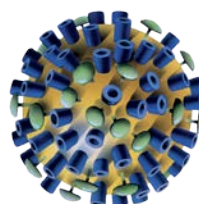

ESWI

... EUROPEAN SCIENTISTS FIGHTING INFLUENZA

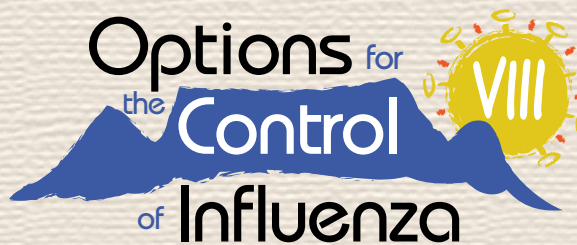

Cape Town, South Africa • 5-10 September 2013

Integress Meetings and Events  
2 Ravinia Drive  
Suite 605  
Atlanta, GA 30346  
+1 404 233 6446  
+1 404 233 2827

## International Society for Influenza and other Respiratory Virus Diseases: isirv

**isirv** is an independent and international scientific professional society promoting the prevention, detection, treatment, and control of influenza and other respiratory virus diseases. It aims to provide opportunities for the exchange of information and for international collaboration between those with a scientific interest in any aspect of influenza and other respiratory viral infections. Thus, its activities include the organization of scientific meetings, promotion of scientific and clinical training, dissemination of information on the impact of acute respiratory viral disease both locally and globally, and publication of scientific information, notably through the journal *Influenza and other Respiratory Diseases*.

The society has lead responsibility for organizing the *Options for the Control of Influenza* conferences, the largest international gatherings exclusively devoted to influenza prevention, control and treatment, including seasonal flu and pandemic preparedness [www.isirv.org](http://www.isirv.org)

## About the *Options VIII* Conference

The *Options* conference is held every 3 to 4 years and is the largest international conference exclusively devoted to all aspects of influenza from basic science to health care policy and pandemic planning. The Organizing and Scientific Committees and Faculty members at the *Options* conference are comprised of leaders and experts on the front line against this formidable adversary.

In addition to basic science, *Options VIII* will provide highly focused information on specialized matters such as the H7N9 outbreak, influenza in immunocompromised patients and those with comorbid conditions, influenza and pregnancy (including an emphasis on clinical impact, pathogenesis, and consequences for the mother and fetus), along with updated seasonal flu information and issues around increasing vaccine production in middle- and low- income countries.

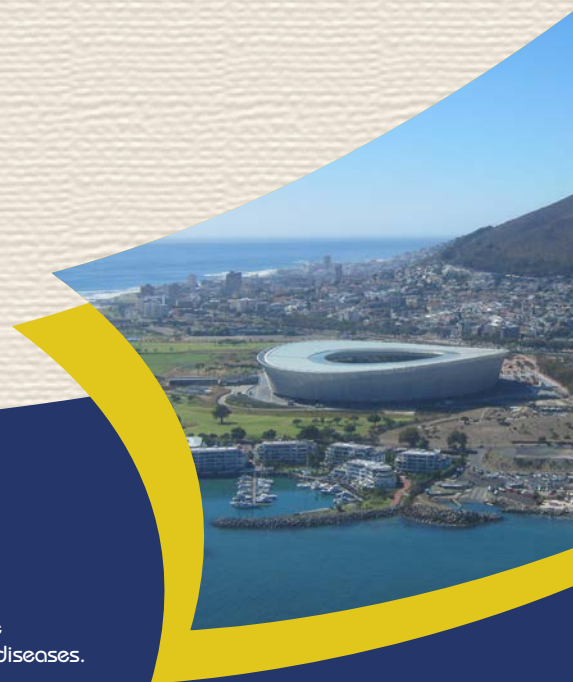

Supplement: Supplementary file 1 [file article_elements_srv.php]
